# Supplementary material for: Reproducibility and Consistency of In Vitro Nucleosome Reconstitutions Demonstrated by Invitrosome Isolation and Sequencing
Source: PLoS One. 2014 Aug 5;9(8):e103752. doi: 10.1371/journal.pone.0103752 (PMC4122377; doi:10.1371/journal.pone.0103752)
Supplement: Tables S1 — Excel file of Pearson's Correlation Coefficient matrices for all experiments. (XLSX) [file pone.0103752.s008.xlsx]

## Sheet: p4.1_p4.2 1-500X
1-500X p4.1_p4.2
	1X_p4.1_rep1	1X_p4.1_rep2	1X_p4.1_rep3	1X_p4.2_rep1	1X_p4.2_rep2	1X_p4.2_rep3
1X_p4.1_rep1		0.284846	0.24485	0.0791273	-0.029341	0.343121
1X_p4.1_rep2	0.284846		0.58609	0.249342	0.5386	-0.13285
1X_p4.1_rep3	0.24485	0.58609		0.447002	0.582733	-0.1385
1X_p4.2_rep1	0.0791273	0.249342	0.447002		0.506374	0.0884729
1X_p4.2_rep2	-0.029341	0.5386	0.582733	0.506374		-0.0537402
1X_p4.2_rep3	0.343121	-0.13285	-0.1385	0.0884729	-0.0537402
	2.5X_p4.1_rep1	2.5X_p4.1_rep2	2.5X_p4.1_rep3	2.5X_p4.2_rep1	2.5X_p4.2_rep2	2.5X_p4.2_rep3
2.5X_p4.1_rep1		0.464529	0.372853	0.376893	0.56655	0.535445
2.5X_p4.1_rep2	0.464529		0.131934	0.251085	0.243884	0.443615
2.5X_p4.1_rep3	0.372853	0.131934		0.487792	0.564187	0.440533
2.5X_p4.2_rep1	0.376893	0.251085	0.487792		0.724025	0.525433
2.5X_p4.2_rep2	0.56655	0.243884	0.564187	0.724025		0.56642
2.5X_p4.2_rep3	0.535445	0.443615	0.440533	0.525433	0.56642
	5X_p4.1_rep1	5X_p4.1_rep2	5X_p4.1_rep3	5X_p4.2_rep1	5X_p4.2_rep2	5X_p4.2_rep3
5X_p4.1_rep1		0.795033	0.67654	0.770459	0.595647	0.733146
5X_p4.1_rep2	0.795033		0.742267	0.759592	0.678335	0.768224
5X_p4.1_rep3	0.67654	0.742267		0.845998	0.635787	0.711155
5X_p4.2_rep1	0.770459	0.759592	0.845998		0.627899	0.753839
5X_p4.2_rep2	0.595647	0.678335	0.635787	0.627899		0.747945
5X_p4.2_rep3	0.733146	0.768224	0.711155	0.753839	0.747945
	10X_p4.1_rep1	10X_p4.1_rep2	10X_p4.1_rep3	10X_p4.2_rep1	10X_p4.2_rep2	10X_p4.2_rep3
10X_p4.1_rep1		0.90425	0.909017	0.901353	0.828665	0.897495
10X_p4.1_rep2	0.90425		0.886561	0.902367	0.832682	0.836099
10X_p4.1_rep3	0.909017	0.886561		0.883852	0.897428	0.904135
10X_p4.2_rep1	0.901353	0.902367	0.883852		0.822362	0.829613
10X_p4.2_rep2	0.828665	0.832682	0.897428	0.822362		0.880993
10X_p4.2_rep3	0.897495	0.836099	0.904135	0.829613	0.880993
	15X_p4.1_rep1	15X_p4.1_rep2	15X_p4.1_rep3	15X_p4.2_rep1	15X_p4.2_rep2	15X_p4.2_rep3
15X_p4.1_rep1		0.907962	0.925572	0.929162	0.928552	0.912321
15X_p4.1_rep2	0.907962		0.934018	0.890847	0.9318	0.930883
15X_p4.1_rep3	0.925572	0.934018		0.938293	0.957841	0.927136
15X_p4.2_rep1	0.929162	0.890847	0.938293		0.954886	0.920442
15X_p4.2_rep2	0.928552	0.9318	0.957841	0.954886		0.912393
15X_p4.2_rep3	0.912321	0.930883	0.927136	0.920442	0.912393
	25X_p4.1_rep1	25X_p4.1_rep2	25X_p4.1_rep3	25X_p4.2_rep1	25X_p4.2_rep2	25X_p4.2_rep3
25X_p4.1_rep1		0.934565	0.968553	0.947185	0.940822	0.897257
25X_p4.1_rep2	0.934565		0.922493	0.931956	0.926299	0.914657
25X_p4.1_rep3	0.968553	0.922493		0.947788	0.915079	0.880293
25X_p4.2_rep1	0.947185	0.931956	0.947788		0.940564	0.926891
25X_p4.2_rep2	0.940822	0.926299	0.915079	0.940564		0.943284
25X_p4.2_rep3	0.897257	0.914657	0.880293	0.926891	0.943284
	35X_p4.1_rep1	35X_p4.1_rep2	35X_p4.1_rep3	35X_p4.2_rep1	35X_p4.2_rep2	35X_p4.2_rep3
35X_p4.1_rep1		0.966264	0.945962	0.960026	0.971958	0.953663
35X_p4.1_rep2	0.966264		0.965152	0.971689	0.979177	0.973591
35X_p4.1_rep3	0.945962	0.965152		0.946182	0.95436	0.95042
35X_p4.2_rep1	0.960026	0.971689	0.946182		0.972853	0.974941
35X_p4.2_rep2	0.971958	0.979177	0.95436	0.972853		0.963847
35X_p4.2_rep3	0.953663	0.973591	0.95042	0.974941	0.963847
	50X_p4.1_rep1	50X_p4.1_rep2	50X_p4.1_rep3	50X_p4.2_rep1	50X_p4.2_rep2	50X_p4.2_rep3
50X_p4.1_rep1		0.971077	0.973662	0.968819	0.978162	0.97654
50X_p4.1_rep2	0.971077		0.966134	0.971293	0.966215	0.966537
50X_p4.1_rep3	0.973662	0.966134		0.965901	0.968264	0.966508
50X_p4.2_rep1	0.968819	0.971293	0.965901		0.982827	0.971603
50X_p4.2_rep2	0.978162	0.966215	0.968264	0.982827		0.980669
50X_p4.2_rep3	0.97654	0.966537	0.966508	0.971603	0.980669
	100X_p4.1_rep1	100X_p4.1_rep2	100X_p4.1_rep3	100X_p4.2_rep1	100X_p4.2_rep2	100X_p4.2_rep3
100X_p4.1_rep1		0.983343	0.990666	0.968695	0.977506	0.973966
100X_p4.1_rep2	0.983343		0.984769	0.986033	0.985469	0.982923
100X_p4.1_rep3	0.990666	0.984769		0.978224	0.988947	0.979581
100X_p4.2_rep1	0.968695	0.986033	0.978224		0.989588	0.983436
100X_p4.2_rep2	0.977506	0.985469	0.988947	0.989588		0.982041
100X_p4.2_rep3	0.973966	0.982923	0.979581	0.983436	0.982041
	500X_p4.1_rep1	500X_p4.1_rep2	500X_p4.1_rep3	500X_p4.2_rep1	500X_p4.2_rep2	500X_p4.2_rep3
500X_p4.1_rep1		0.996634	0.994785	0.990024	0.989257	0.991487
500X_p4.1_rep2	0.996634		0.995881	0.989649	0.98671	0.989102
500X_p4.1_rep3	0.994785	0.995881		0.99369	0.990705	0.992771
500X_p4.2_rep1	0.990024	0.989649	0.99369		0.99702	0.997518
500X_p4.2_rep2	0.989257	0.98671	0.990705	0.99702		0.99848
500X_p4.2_rep3	0.991487	0.989102	0.992771	0.997518	0.99848

## Sheet: p7.1_p7.2 1-500X
1-500X p7.1_p7.2
	1X_p7.1_rep1	1X_p7.1_rep2	1X_p7.1_rep3	1X_p7.2_rep1	1X_p7.2_rep2	1X_p7.2_rep3
1X_p7.1_rep1		0.767425	0.87398	0.871809	0.804233	0.6371
1X_p7.1_rep2	0.767425		0.723472	0.781243	0.726309	0.413526
1X_p7.1_rep3	0.87398	0.723472		0.818508	0.8013	0.422585
1X_p7.2_rep1	0.871809	0.781243	0.818508		0.838456	0.348836
1X_p7.2_rep2	0.804233	0.726309	0.8013	0.838456		0.209996
1X_p7.2_rep3	0.6371	0.413526	0.422585	0.348836	0.209996
	2.5X_p7.1_rep1	2.5X_p7.1_rep2	2.5X_p7.1_rep3	2.5X_p7.2_rep1	2.5X_p7.2_rep2	2.5X_p7.2_rep3
2.5X_p7.1_rep1		0.809044	0.704862	0.758979	0.785308	0.655127
2.5X_p7.1_rep2	0.809044		0.771644	0.785828	0.771463	0.83923
2.5X_p7.1_rep3	0.704862	0.771644		0.899856	0.872532	0.75489
2.5X_p7.2_rep1	0.758979	0.785828	0.899856		0.819877	0.740144
2.5X_p7.2_rep2	0.785308	0.771463	0.872532	0.819877		0.77925
2.5X_p7.2_rep3	0.655127	0.83923	0.75489	0.740144	0.77925
	5X_p7.1_rep1	5X_p7.1_rep2	5X_p7.1_rep3	5X_p7.2_rep1	5X_p7.2_rep2	5X_p7.2_rep3
5X_p7.1_rep1		0.911744	0.821127	0.806352	0.892853	0.873783
5X_p7.1_rep2	0.911744		0.888865	0.837621	0.904992	0.902437
5X_p7.1_rep3	0.821127	0.888865		0.881388	0.906656	0.884288
5X_p7.2_rep1	0.806352	0.837621	0.881388		0.871653	0.852746
5X_p7.2_rep2	0.892853	0.904992	0.906656	0.871653		0.886545
5X_p7.2_rep3	0.873783	0.902437	0.884288	0.852746	0.886545
	10X_p7.1_rep1	10X_p7.1_rep2	10X_p7.1_rep3	10X_p7.2_rep1	10X_p7.2_rep2	10X_p7.2_rep3
10X_p7.1_rep1		0.926821	0.944003	0.904816	0.905034	0.90896
10X_p7.1_rep2	0.926821		0.961004	0.949789	0.96647	0.964181
10X_p7.1_rep3	0.944003	0.961004		0.932332	0.954795	0.953112
10X_p7.2_rep1	0.904816	0.949789	0.932332		0.952701	0.948603
10X_p7.2_rep2	0.905034	0.96647	0.954795	0.952701		0.968523
10X_p7.2_rep3	0.90896	0.964181	0.953112	0.948603	0.968523
	15X_p7.1_rep1	15X_p7.1_rep2	15X_p7.1_rep3	15X_p7.2_rep1	15X_p7.2_rep2	15X_p7.2_rep3
15X_p7.1_rep1		0.967682	0.961383	0.941596	0.946076	0.954167
15X_p7.1_rep2	0.967682		0.964916	0.966301	0.960615	0.963751
15X_p7.1_rep3	0.961383	0.964916		0.95045	0.949933	0.968028
15X_p7.2_rep1	0.941596	0.966301	0.95045		0.973515	0.960254
15X_p7.2_rep2	0.946076	0.960615	0.949933	0.973515		0.959417
15X_p7.2_rep3	0.954167	0.963751	0.968028	0.960254	0.959417
	25X_p7.1_rep1	25X_p7.1_rep2	25X_p7.1_rep3	25X_p7.2_rep1	25X_p7.2_rep2	25X_p7.2_rep3
25X_p7.1_rep1		0.973482	0.983572	0.983626	0.976242	0.988496
25X_p7.1_rep2	0.973482		0.968681	0.981639	0.97401	0.973011
25X_p7.1_rep3	0.983572	0.968681		0.98464	0.964665	0.98531
25X_p7.2_rep1	0.983626	0.981639	0.98464		0.979354	0.987491
25X_p7.2_rep2	0.976242	0.97401	0.964665	0.979354		0.973187
25X_p7.2_rep3	0.988496	0.973011	0.98531	0.987491	0.973187
	35X_p7.1_rep1	35X_p7.1_rep2	35X_p7.1_rep3	35X_p7.2_rep1	35X_p7.2_rep2	35X_p7.2_rep3
35X_p7.1_rep1		0.983631	0.986656	0.987997	0.976392	0.980284
35X_p7.1_rep2	0.983631		0.987092	0.98408	0.956895	0.976267
35X_p7.1_rep3	0.986656	0.987092		0.987948	0.97669	0.988631
35X_p7.2_rep1	0.987997	0.98408	0.987948		0.972699	0.984041
35X_p7.2_rep2	0.976392	0.956895	0.97669	0.972699		0.987749
35X_p7.2_rep3	0.980284	0.976267	0.988631	0.984041	0.987749
	50X_p7.1_rep1	50X_p7.1_rep2	50X_p7.1_rep3	50X_p7.2_rep1	50X_p7.2_rep2	50X_p7.2_rep3
50X_p7.1_rep1		0.988604	0.984745	0.98668	0.978867	0.981406
50X_p7.1_rep2	0.988604		0.992626	0.986295	0.98579	0.992211
50X_p7.1_rep3	0.984745	0.992626		0.991402	0.986977	0.992072
50X_p7.2_rep1	0.98668	0.986295	0.991402		0.987713	0.988427
50X_p7.2_rep2	0.978867	0.98579	0.986977	0.987713		0.989367
50X_p7.2_rep3	0.981406	0.992211	0.992072	0.988427	0.989367
	100X_p7.1_rep1	100X_p7.1_rep2	100X_p7.1_rep3	100X_p7.2_rep1	100X_p7.2_rep2	100X_p7.2_rep3
100X_p7.1_rep1		0.994388	0.994433	0.994281	0.994685	0.99467
100X_p7.1_rep2	0.994388		0.993539	0.992103	0.98851	0.990109
100X_p7.1_rep3	0.994433	0.993539		0.992807	0.99391	0.993355
100X_p7.2_rep1	0.994281	0.992103	0.992807		0.996444	0.995772
100X_p7.2_rep2	0.994685	0.98851	0.99391	0.996444		0.996708
100X_p7.2_rep3	0.99467	0.990109	0.993355	0.995772	0.996708
	500X_p7.1_rep1	500X_p7.1_rep2	500X_p7.1_rep3	500X_p7.2_rep1	500X_p7.2_rep2	500X_p7.2_rep3
500X_p7.1_rep1		0.998626	0.999064	0.997817	0.997408	0.997852
500X_p7.1_rep2	0.998626		0.999247	0.997726	0.997775	0.998272
500X_p7.1_rep3	0.999064	0.999247		0.997537	0.997251	0.997847
500X_p7.2_rep1	0.997817	0.997726	0.997537		0.99886	0.999238
500X_p7.2_rep2	0.997408	0.997775	0.997251	0.99886		0.998667
500X_p7.2_rep3	0.997852	0.998272	0.997847	0.999238	0.998667

## Sheet: kat group
1-10X p4.1_p4.2
	1X_p4.1_rep1	1X_p4.1_rep2	1X_p4.1_rep3	1X_p4.2_rep1	1X_p4.2_rep2	1X_p4.2_rep3
1X_p4.1_rep1		0.284846	0.24485	0.0791273	-0.029341	0.343121
1X_p4.1_rep2	0.284846		0.58609	0.249342	0.5386	-0.13285
1X_p4.1_rep3	0.24485	0.58609		0.447002	0.582733	-0.1385
1X_p4.2_rep1	0.0791273	0.249342	0.447002		0.506374	0.0884729
1X_p4.2_rep2	-0.029341	0.5386	0.582733	0.506374		-0.0537402
1X_p4.2_rep3	0.343121	-0.13285	-0.1385	0.0884729	-0.0537402
	2.5X_p4.1_rep1	2.5X_p4.1_rep2	2.5X_p4.1_rep3	2.5X_p4.2_rep1	2.5X_p4.2_rep2	2.5X_p4.2_rep3
2.5X_p4.1_rep1		0.464529	0.372853	0.376893	0.56655	0.535445
2.5X_p4.1_rep2	0.464529		0.131934	0.251085	0.243884	0.443615
2.5X_p4.1_rep3	0.372853	0.131934		0.487792	0.564187	0.440533
2.5X_p4.2_rep1	0.376893	0.251085	0.487792		0.724025	0.525433
2.5X_p4.2_rep2	0.56655	0.243884	0.564187	0.724025		0.56642
2.5X_p4.2_rep3	0.535445	0.443615	0.440533	0.525433	0.56642
	5X_p4.1_rep1	5X_p4.1_rep2	5X_p4.1_rep3	5X_p4.2_rep1	5X_p4.2_rep2	5X_p4.2_rep3
5X_p4.1_rep1		0.795033	0.67654	0.770459	0.595647	0.733146
5X_p4.1_rep2	0.795033		0.742267	0.759592	0.678335	0.768224
5X_p4.1_rep3	0.67654	0.742267		0.845998	0.635787	0.711155
5X_p4.2_rep1	0.770459	0.759592	0.845998		0.627899	0.753839
5X_p4.2_rep2	0.595647	0.678335	0.635787	0.627899		0.747945
5X_p4.2_rep3	0.733146	0.768224	0.711155	0.753839	0.747945
	10X_p4.1_rep1	10X_p4.1_rep2	10X_p4.1_rep3	10X_p4.2_rep1	10X_p4.2_rep2	10X_p4.2_rep3
10X_p4.1_rep1		0.90425	0.909017	0.901353	0.828665	0.897495
10X_p4.1_rep2	0.90425		0.886561	0.902367	0.832682	0.836099
10X_p4.1_rep3	0.909017	0.886561		0.883852	0.897428	0.904135
10X_p4.2_rep1	0.901353	0.902367	0.883852		0.822362	0.829613
10X_p4.2_rep2	0.828665	0.832682	0.897428	0.822362		0.880993
10X_p4.2_rep3	0.897495	0.836099	0.904135	0.829613	0.880993
1-10X p4.1_p4.3
	1X_p4.3_rep1	1X_p4.3_rep2	1X_p4.3_rep3	1X_p4.1_rep1	1X_p4.1_rep2	1X_p4.1_rep3
1X_p4.3_rep1		0.229382	0.31855	-0.0177223	-0.179719	-0.0211738
1X_p4.3_rep2	0.229382		0.509173	0.298321	-0.129501	-0.288592
1X_p4.3_rep3	0.31855	0.509173		0.463283	0.0875984	0.209709
1X_p4.1_rep1	-0.0177223	0.298321	0.463283		0.284846	0.24485
1X_p4.1_rep2	-0.179719	-0.129501	0.0875984	0.284846		0.58609
1X_p4.1_rep3	-0.0211738	-0.288592	0.209709	0.24485	0.58609
	2.5X_p4.3_rep1	2.5X_p4.3_rep2	2.5X_p4.3_rep3	2.5X_p4.1_rep1	2.5X_p4.1_rep2	2.5X_p4.1_rep3
2.5X_p4.3_rep1		0.376646	0.719887	0.429506	0.341334	0.27402
2.5X_p4.3_rep2	0.376646		0.319476	0.673883	0.212554	0.521976
2.5X_p4.3_rep3	0.719887	0.319476		0.306061	0.374821	0.392775
2.5X_p4.1_rep1	0.429506	0.673883	0.306061		0.464529	0.372853
2.5X_p4.1_rep2	0.341334	0.212554	0.374821	0.464529		0.131934
2.5X_p4.1_rep3	0.27402	0.521976	0.392775	0.372853	0.131934
	5X_p4.3_rep1	5X_p4.3_rep2	5X_p4.3_rep3	5X_p4.1_rep1	5X_p4.1_rep2	5X_p4.1_rep3
5X_p4.3_rep1		0.524732	0.627057	0.701495	0.683628	0.699746
5X_p4.3_rep2	0.524732		0.540129	0.649141	0.723021	0.727903
5X_p4.3_rep3	0.627057	0.540129		0.740993	0.741715	0.551685
5X_p4.1_rep1	0.701495	0.649141	0.740993		0.795033	0.67654
5X_p4.1_rep2	0.683628	0.723021	0.741715	0.795033		0.742267
5X_p4.1_rep3	0.699746	0.727903	0.551685	0.67654	0.742267
	10X_p4.3_rep1	10X_p4.3_rep2	10X_p4.3_rep3	10X_p4.1_rep1	10X_p4.1_rep2	10X_p4.1_rep3
10X_p4.3_rep1		0.853787	0.835222	0.863638	0.87484	0.880911
10X_p4.3_rep2	0.853787		0.790405	0.904754	0.827214	0.871667
10X_p4.3_rep3	0.835222	0.790405		0.870043	0.818174	0.879471
10X_p4.1_rep1	0.863638	0.904754	0.870043		0.90425	0.909017
10X_p4.1_rep2	0.87484	0.827214	0.818174	0.90425		0.886561
10X_p4.1_rep3	0.880911	0.871667	0.879471	0.909017	0.886561
1-10X p4.1_p4.4
	1X_p4.4_rep1	1X_p4.4_rep2	1X_p4.4_rep3	1X_p4.1_rep1	1X_p4.1_rep2	1X_p4.1_rep3
1X_p4.4_rep1		-0.0394441	-0.340663	-0.222809	-0.24154	-0.193326
1X_p4.4_rep2	-0.0394441		0.0233164	0.157557	0.166833	0.261398
1X_p4.4_rep3	-0.340663	0.0233164		0.136371	-0.080458	0.3246
1X_p4.1_rep1	-0.222809	0.157557	0.136371		0.284846	0.24485
1X_p4.1_rep2	-0.24154	0.166833	-0.080458	0.284846		0.58609
1X_p4.1_rep3	-0.193326	0.261398	0.3246	0.24485	0.58609
	2.5X_p4.4_rep1	2.5X_p4.4_rep2	2.5X_p4.4_rep3	2.5X_p4.1_rep1	2.5X_p4.1_rep2	2.5X_p4.1_rep3
2.5X_p4.4_rep1		0.288496	0.45918	0.511384	0.433018	0.350145
2.5X_p4.4_rep2	0.288496		0.645494	0.419716	0.153709	0.406975
2.5X_p4.4_rep3	0.45918	0.645494		0.730881	0.467066	0.385104
2.5X_p4.1_rep1	0.511384	0.419716	0.730881		0.464529	0.372853
2.5X_p4.1_rep2	0.433018	0.153709	0.467066	0.464529		0.131934
2.5X_p4.1_rep3	0.350145	0.406975	0.385104	0.372853	0.131934
	5X_p4.4_rep1	5X_p4.4_rep2	5X_p4.4_rep3	5X_p4.1_rep1	5X_p4.1_rep2	5X_p4.1_rep3
5X_p4.4_rep1		0.568736	0.624552	0.685342	0.611359	0.642624
5X_p4.4_rep2	0.568736		0.763134	0.780055	0.777197	0.708886
5X_p4.4_rep3	0.624552	0.763134		0.801637	0.745506	0.736225
5X_p4.1_rep1	0.685342	0.780055	0.801637		0.795033	0.67654
5X_p4.1_rep2	0.611359	0.777197	0.745506	0.795033		0.742267
5X_p4.1_rep3	0.642624	0.708886	0.736225	0.67654	0.742267
	10X_p4.4_rep1	10X_p4.4_rep2	10X_p4.4_rep3	10X_p4.1_rep1	p4.4X_p4.1_rep2	10X_p4.1_rep3
10X_p4.4_rep1		0.825381	0.898158	0.860642	0.826998	0.888984
10X_p4.4_rep2	0.825381		0.828303	0.806177	0.777788	0.85171
10X_p4.4_rep3	0.898158	0.828303		0.860156	0.881441	0.902303
10X_p4.1_rep1	0.860642	0.806177	0.860156		0.90425	0.909017
10X_p4.1_rep2	0.826998	0.777788	0.881441	0.90425		0.886561
10X_p4.1_rep3	0.888984	0.85171	0.902303	0.909017	0.886561
1-10X p4.2_p4.3
	1X_p4.3_rep1	1X_p4.3_rep2	1X_p4.3_rep3	1X_p4.2_rep1	1X_p4.2_rep2	1X_p4.2_rep3
1X_p4.3_rep1		0.229382	0.31855	0.399042	-0.0653066	0.452888
1X_p4.3_rep2	0.229382		0.509173	-0.17279	-0.153978	0.898551
1X_p4.3_rep3	0.31855	0.509173		0.416558	0.224778	0.646038
1X_p4.2_rep1	0.399042	-0.17279	0.416558		0.506374	0.0884729
1X_p4.2_rep2	-0.0653066	-0.153978	0.224778	0.506374		-0.0537402
1X_p4.2_rep3	0.452888	0.898551	0.646038	0.0884729	-0.0537402
	2.5X_p4.3_rep1	2.5X_p4.3_rep2	2.5X_p4.3_rep3	2.5X_p4.2_rep1	2.5X_p4.2_rep2	2.5X_p4.2_rep3
2.5X_p4.3_rep1		0.376646	0.719887	0.381059	0.60678	0.663095
2.5X_p4.3_rep2	0.376646		0.319476	0.41302	0.59378	0.492795
2.5X_p4.3_rep3	0.719887	0.319476		0.431925	0.448799	0.687967
2.5X_p4.2_rep1	0.381059	0.41302	0.431925		0.724025	0.525433
2.5X_p4.2_rep2	0.60678	0.59378	0.448799	0.724025		0.56642
2.5X_p4.2_rep3	0.663095	0.492795	0.687967	0.525433	0.56642
	5X_p4.3_rep1	5X_p4.3_rep2	5X_p4.3_rep3	5X_p4.2_rep1	5X_p4.2_rep2	5X_p4.2_rep3
5X_p4.3_rep1		0.524732	0.627057	0.711541	0.488727	0.660982
5X_p4.3_rep2	0.524732		0.540129	0.707191	0.7068	0.711271
5X_p4.3_rep3	0.627057	0.540129		0.649485	0.563742	0.80069
5X_p4.2_rep1	0.711541	0.707191	0.649485		0.627899	0.753839
5X_p4.2_rep2	0.488727	0.7068	0.563742	0.627899		0.747945
5X_p4.2_rep3	0.660982	0.711271	0.80069	0.753839	0.747945
	10X_p4.3_rep1	10X_p4.3_rep2	10X_p4.3_rep3	10X_p4.2_rep1	10X_p4.2_rep2	10X_p4.2_rep3
10X_p4.3_rep1		0.853787	0.835222	0.82334	0.829001	0.904969
10X_p4.3_rep2	0.853787		0.790405	0.824609	0.800986	0.839253
10X_p4.3_rep3	0.835222	0.790405		0.779022	0.850874	0.898028
10X_p4.2_rep1	0.82334	0.824609	0.779022		0.822362	0.829613
10X_p4.2_rep2	0.829001	0.800986	0.850874	0.822362		0.880993
10X_p4.2_rep3	0.904969	0.839253	0.898028	0.829613	0.880993
1-10X p4.2_p4.4
	1X_p4.4_rep1	1X_p4.4_rep2	1X_p4.4_rep3	1X_p4.2_rep1	1X_p4.2_rep2	1X_p4.2_rep3
1X_p4.4_rep1		-0.0394441	-0.340663	-0.192282	-0.208135	-0.074738
1X_p4.4_rep2	-0.0394441		0.0233164	0.115789	0.587558	-0.123794
1X_p4.4_rep3	-0.340663	0.0233164		0.47294	0.133407	0.132984
1X_p4.2_rep1	-0.192282	0.115789	0.47294		0.506374	0.0884729
1X_p4.2_rep2	-0.208135	0.587558	0.133407	0.506374		-0.0537402
1X_p4.2_rep3	-0.074738	-0.123794	0.132984	0.0884729	-0.0537402
	2.5X_p4.4_rep1	2.5X_p4.4_rep2	2.5X_p4.4_rep3	2.5X_p4.2_rep1	2.5X_p4.2_rep2	2.5X_p4.2_rep3
2.5X_p4.4_rep1		0.288496	0.45918	0.628938	0.543549	0.356142
2.5X_p4.4_rep2	0.288496		0.645494	0.496578	0.634854	0.546181
2.5X_p4.4_rep3	0.45918	0.645494		0.502033	0.746189	0.561006
2.5X_p4.2_rep1	0.628938	0.496578	0.502033		0.724025	0.525433
2.5X_p4.2_rep2	0.543549	0.634854	0.746189	0.724025		0.56642
2.5X_p4.2_rep3	0.356142	0.546181	0.561006	0.525433	0.56642
	5X_p4.4_rep1	5X_p4.4_rep2	5X_p4.4_rep3	5X_p4.2_rep1	5X_p4.2_rep2	5X_p4.2_rep3
5X_p4.4_rep1		0.568736	0.624552	0.747663	0.606699	0.782426
5X_p4.4_rep2	0.568736		0.763134	0.701855	0.68984	0.794744
5X_p4.4_rep3	0.624552	0.763134		0.782265	0.496721	0.675883
5X_p4.2_rep1	0.747663	0.701855	0.782265		0.627899	0.753839
5X_p4.2_rep2	0.606699	0.68984	0.496721	0.627899		0.747945
5X_p4.2_rep3	0.782426	0.794744	0.675883	0.753839	0.747945
	10X_p4.4_rep1	10X_p4.4_rep2	10X_p4.4_rep3	10X_p4.2_rep1	10X_p4.2_rep2	10X_p4.2_rep3
10X_p4.4_rep1		0.825381	0.898158	0.85617	0.9211	0.888955
10X_p4.4_rep2	0.825381		0.828303	0.83719	0.772154	0.840334
10X_p4.4_rep3	0.898158	0.828303		0.833083	0.911526	0.909436
10X_p4.2_rep1	0.85617	0.83719	0.833083		0.822362	0.829613
10X_p4.2_rep2	0.9211	0.772154	0.911526	0.822362		0.880993
10X_p4.2_rep3	0.888955	0.840334	0.909436	0.829613	0.880993
1-10X p4.3 p4.4
	1X_p4.3_rep1	1X_p4.3_rep2	1X_p4.3_rep3	1X_p4.4_rep1	1X_p4.4_rep2	1X_p4.4_rep3
1X_p4.3_rep1		0.229382	0.31855	0.113688	-0.276854	0.170207
1X_p4.3_rep2	0.229382		0.509173	-0.133422	0.0436618	-0.0942671
1X_p4.3_rep3	0.31855	0.509173		-0.156776	0.226208	0.377856
1X_p4.4_rep1	0.113688	-0.133422	-0.156776		-0.0394441	-0.340663
1X_p4.4_rep2	-0.276854	0.0436618	0.226208	-0.0394441		0.0233164
1X_p4.4_rep3	0.170207	-0.0942671	0.377856	-0.340663	0.0233164
	2.5X_p4.3_rep1	2.5X_p4.3_rep2	2.5X_p4.3_rep3	2.5X_p4.4_rep1	2.5X_p4.4_rep2	2.5X_p4.4_rep3
2.5X_p4.3_rep1		0.376646	0.719887	0.152257	0.644529	0.615649
2.5X_p4.3_rep2	0.376646		0.319476	0.495098	0.581538	0.638312
2.5X_p4.3_rep3	0.719887	0.319476		0.234492	0.51738	0.361272
2.5X_p4.4_rep1	0.152257	0.495098	0.234492		0.288496	0.45918
2.5X_p4.4_rep2	0.644529	0.581538	0.51738	0.288496		0.645494
2.5X_p4.4_rep3	0.615649	0.638312	0.361272	0.45918	0.645494
	5X_p4.3_rep1	5X_p4.3_rep2	5X_p4.3_rep3	5X_p4.4_rep1	5X_p4.4_rep2	5X_p4.4_rep3
5X_p4.3_rep1		0.524732	0.627057	0.482968	0.695531	0.654121
5X_p4.3_rep2	0.524732		0.540129	0.584652	0.74928	0.709993
5X_p4.3_rep3	0.627057	0.540129		0.578122	0.702828	0.612293
5X_p4.4_rep1	0.482968	0.584652	0.578122		0.568736	0.624552
5X_p4.4_rep2	0.695531	0.74928	0.702828	0.568736		0.763134
5X_p4.4_rep3	0.654121	0.709993	0.612293	0.624552	0.763134
	10X_p4.3_rep1	10X_p4.3_rep2	10X_p4.3_rep3	10X_p4.4_rep1	10X_p4.4_rep2	10X_p4.4_rep3
10X_p4.3_rep1		0.853787	0.835222	0.864693	0.787853	0.905746
10X_p4.3_rep2	0.853787		0.790405	0.773756	0.747433	0.83651
10X_p4.3_rep3	0.835222	0.790405		0.845982	0.826798	0.875323
10X_p4.4_rep1	0.864693	0.773756	0.845982		0.825381	0.898158
10X_p4.4_rep2	0.787853	0.747433	0.826798	0.825381		0.828303
10X_p4.4_rep3	0.905746	0.83651	0.875323	0.898158	0.828303

## Sheet: sèt group
1-10X p7.1_p7.2
	1X_p7.1_rep1	1X_p7.1_rep2	1X_p7.1_rep3	1X_p7.2_rep1	1X_p7.2_rep2	1X_p7.2_rep3
1X_p7.1_rep1		0.767425	0.87398	0.871809	0.804233	0.6371
1X_p7.1_rep2	0.767425		0.723472	0.781243	0.726309	0.413526
1X_p7.1_rep3	0.87398	0.723472		0.818508	0.8013	0.422585
1X_p7.2_rep1	0.871809	0.781243	0.818508		0.838456	0.348836
1X_p7.2_rep2	0.804233	0.726309	0.8013	0.838456		0.209996
1X_p7.2_rep3	0.6371	0.413526	0.422585	0.348836	0.209996
	2.5X_p7.1_rep1	2.5X_p7.1_rep2	2.5X_p7.1_rep3	2.5X_p7.2_rep1	2.5X_p7.2_rep2	2.5X_p7.2_rep3
2.5X_p7.1_rep1		0.809044	0.704862	0.758979	0.785308	0.655127
2.5X_p7.1_rep2	0.809044		0.771644	0.785828	0.771463	0.83923
2.5X_p7.1_rep3	0.704862	0.771644		0.899856	0.872532	0.75489
2.5X_p7.2_rep1	0.758979	0.785828	0.899856		0.819877	0.740144
2.5X_p7.2_rep2	0.785308	0.771463	0.872532	0.819877		0.77925
2.5X_p7.2_rep3	0.655127	0.83923	0.75489	0.740144	0.77925
	5X_p7.1_rep1	5X_p7.1_rep2	5X_p7.1_rep3	5X_p7.2_rep1	5X_p7.2_rep2	5X_p7.2_rep3
5X_p7.1_rep1		0.911744	0.821127	0.806352	0.892853	0.873783
5X_p7.1_rep2	0.911744		0.888865	0.837621	0.904992	0.902437
5X_p7.1_rep3	0.821127	0.888865		0.881388	0.906656	0.884288
5X_p7.2_rep1	0.806352	0.837621	0.881388		0.871653	0.852746
5X_p7.2_rep2	0.892853	0.904992	0.906656	0.871653		0.886545
5X_p7.2_rep3	0.873783	0.902437	0.884288	0.852746	0.886545
	10X_p7.1_rep1	10X_p7.1_rep2	10X_p7.1_rep3	10X_p7.2_rep1	10X_p7.2_rep2	10X_p7.2_rep3
10X_p7.1_rep1		0.926821	0.944003	0.904816	0.905034	0.90896
10X_p7.1_rep2	0.926821		0.961004	0.949789	0.96647	0.964181
10X_p7.1_rep3	0.944003	0.961004		0.932332	0.954795	0.953112
10X_p7.2_rep1	0.904816	0.949789	0.932332		0.952701	0.948603
10X_p7.2_rep2	0.905034	0.96647	0.954795	0.952701		0.968523
10X_p7.2_rep3	0.90896	0.964181	0.953112	0.948603	0.968523
1-10X p7.1_p7.3
	1X_p7.1_rep1	1X_p7.1_rep2	1X_p7.1_rep3	1X_p7.3_rep1	1X_p7.3_rep2	1X_p7.3_rep3
1X_p7.1_rep1		0.767425	0.87398	0.648178	0.811778	0.466282
1X_p7.1_rep2	0.767425		0.723472	0.443514	0.525372	0.234264
1X_p7.1_rep3	0.87398	0.723472		0.533287	0.671401	0.495661
1X_p7.3_rep1	0.648178	0.443514	0.533287		0.13404	0.337298
1X_p7.3_rep2	0.811778	0.525372	0.671401	0.13404		0.344112
1X_p7.3_rep3	0.466282	0.234264	0.495661	0.337298	0.344112
	2.5X_p7.1_rep1	2.5X_p7.1_rep2	2.5X_p7.1_rep3	2.5X_p7.3_rep1	2.5X_p7.3_rep2	2.5X_p7.3_rep3
2.5X_p7.1_rep1		0.809044	0.704862	0.844621	0.761776	0.791478
2.5X_p7.1_rep2	0.809044		0.771644	0.791518	0.676273	0.787943
2.5X_p7.1_rep3	0.704862	0.771644		0.751472	0.523594	0.825084
2.5X_p7.3_rep1	0.844621	0.791518	0.751472		0.643308	0.836289
2.5X_p7.3_rep2	0.761776	0.676273	0.523594	0.643308		0.692637
2.5X_p7.3_rep3	0.791478	0.787943	0.825084	0.836289	0.692637
	5X_p7.1_rep1	5X_p7.1_rep2	5X_p7.1_rep3	5X_p7.3_rep1	5X_p7.3_rep2	5X_p7.3_rep3
5X_p7.1_rep1		0.911744	0.821127	0.846669	0.84858	0.88643
5X_p7.1_rep2	0.911744		0.888865	0.903657	0.870432	0.921745
5X_p7.1_rep3	0.821127	0.888865		0.9116	0.887131	0.906988
5X_p7.3_rep1	0.846669	0.903657	0.9116		0.875453	0.950041
5X_p7.3_rep2	0.84858	0.870432	0.887131	0.875453		0.879006
5X_p7.3_rep3	0.88643	0.921745	0.906988	0.950041	0.879006
	10X_p7.1_rep1	10X_p7.1_rep2	10X_p7.1_rep3	10X_p7.3_rep1	10X_p7.3_rep2	10X_p7.3_rep3
10X_p7.1_rep1		0.926821	0.944003	0.877597	0.951398	0.859154
10X_p7.1_rep2	0.926821		0.961004	0.930658	0.920661	0.940353
10X_p7.1_rep3	0.944003	0.961004		0.915417	0.925622	0.939117
10X_p7.3_rep1	0.877597	0.930658	0.915417		0.927357	0.938222
10X_p7.3_rep2	0.951398	0.920661	0.925622	0.927357		0.88597
10X_p7.3_rep3	0.859154	0.940353	0.939117	0.938222	0.88597
1-10X p7.1_p7.4
	1X_p7.1_rep1	1X_p7.1_rep2	1X_p7.1_rep3	1X_p7.4_rep1	1X_p7.4_rep2	1X_p7.4_rep3
1X_p7.1_rep1		0.767425	0.87398	0.60924	0.0413925	0.678844
1X_p7.1_rep2	0.767425		0.723472	0.4599	-0.0268243	0.601022
1X_p7.1_rep3	0.87398	0.723472		0.556991	0.0175691	0.688308
1X_p7.4_rep1	0.60924	0.4599	0.556991		0.547944	0.78379
1X_p7.4_rep2	0.0413925	-0.0268243	0.0175691	0.547944		0.36306
1X_p7.4_rep3	0.678844	0.601022	0.688308	0.78379	0.36306
	2.5X_p7.1_rep1	2.5X_p7.1_rep2	2.5X_p7.1_rep3	2.5X_p7.4_rep1	2.5X_p7.4_rep2	2.5X_p7.4_rep3
2.5X_p7.1_rep1		0.809044	0.704862	0.87948	0.778898	0.903573
2.5X_p7.1_rep2	0.809044		0.771644	0.761325	0.799279	0.82587
2.5X_p7.1_rep3	0.704862	0.771644		0.764578	0.740805	0.743736
2.5X_p7.4_rep1	0.87948	0.761325	0.764578		0.733999	0.862349
2.5X_p7.4_rep2	0.778898	0.799279	0.740805	0.733999		0.833359
2.5X_p7.4_rep3	0.903573	0.82587	0.743736	0.862349	0.833359
	5X_p7.1_rep1	5X_p7.1_rep2	5X_p7.1_rep3	5X_p7.4_rep1	5X_p7.4_rep2	5X_p7.4_rep3
5X_p7.1_rep1		0.911744	0.821127	0.84558	0.833588	0.746198
5X_p7.1_rep2	0.911744		0.888865	0.885727	0.887431	0.804918
5X_p7.1_rep3	0.821127	0.888865		0.9244	0.905311	0.856752
5X_p7.4_rep1	0.84558	0.885727	0.9244		0.900723	0.86374
5X_p7.4_rep2	0.833588	0.887431	0.905311	0.900723		0.818123
5X_p7.4_rep3	0.746198	0.804918	0.856752	0.86374	0.818123
	10X_p7.1_rep1	10X_p7.1_rep2	10X_p7.1_rep3	10X_p7.4_rep1	10X_p7.4_rep2	10X_p7.4_rep3
10X_p7.1_rep1		0.926821	0.944003	0.917366	0.936554	0.910235
10X_p7.1_rep2	0.926821		0.961004	0.919931	0.939681	0.944253
10X_p7.1_rep3	0.944003	0.961004		0.921055	0.938295	0.916624
10X_p7.4_rep1	0.917366	0.919931	0.921055		0.953719	0.935651
10X_p7.4_rep2	0.936554	0.939681	0.938295	0.953719		0.919192
10X_p7.4_rep3	0.910235	0.944253	0.916624	0.935651	0.919192
1-10X p7.1_p7.5
	1X_p7.1_rep1	1X_p7.1_rep2	1X_p7.1_rep3	1X_p7.5_rep1	1X_p7.5_rep2	1X_p7.5_rep3
1X_p7.1_rep1		0.767425	0.87398	0.766513	0.676454	0.590089
1X_p7.1_rep2	0.767425		0.723472	0.460322	0.551856	0.369743
1X_p7.1_rep3	0.87398	0.723472		0.776227	0.654773	0.669952
1X_p7.5_rep1	0.766513	0.460322	0.776227		0.447531	0.452859
1X_p7.5_rep2	0.676454	0.551856	0.654773	0.447531		0.367814
1X_p7.5_rep3	0.590089	0.369743	0.669952	0.452859	0.367814
	2.5X_p7.1_rep1	2.5X_p7.1_rep2	2.5X_p7.1_rep3	2.5X_p7.5_rep1	2.5X_p7.5_rep2	2.5X_p7.5_rep3
2.5X_p7.1_rep1		0.809044	0.704862	0.901747	0.565159	0.838651
2.5X_p7.1_rep2	0.809044		0.771644	0.737125	0.710647	0.779258
2.5X_p7.1_rep3	0.704862	0.771644		0.770053	0.66427	0.832227
2.5X_p7.5_rep1	0.901747	0.737125	0.770053		0.555247	0.817069
2.5X_p7.5_rep2	0.565159	0.710647	0.66427	0.555247		0.568073
2.5X_p7.5_rep3	0.838651	0.779258	0.832227	0.817069	0.568073
	5X_p7.1_rep1	5X_p7.1_rep2	5X_p7.1_rep3	5X_p7.5_rep1	5X_p7.5_rep2	5X_p7.5_rep3
5X_p7.1_rep1		0.911744	0.821127	0.809037	0.834511	0.883941
5X_p7.1_rep2	0.911744		0.888865	0.856605	0.836046	0.910744
5X_p7.1_rep3	0.821127	0.888865		0.918776	0.889197	0.889922
5X_p7.5_rep1	0.809037	0.856605	0.918776		0.865276	0.84854
5X_p7.5_rep2	0.834511	0.836046	0.889197	0.865276		0.835623
5X_p7.5_rep3	0.883941	0.910744	0.889922	0.84854	0.835623
	10X_p7.1_rep1	10X_p7.1_rep2	10X_p7.1_rep3	10X_p7.5_rep1	10X_p7.5_rep2	10X_p7.5_rep3
10X_p7.1_rep1		0.926821	0.944003	0.920015	0.962041	0.911551
10X_p7.1_rep2	0.926821		0.961004	0.962716	0.940086	0.939863
10X_p7.1_rep3	0.944003	0.961004		0.965362	0.952028	0.91437
10X_p7.5_rep1	0.920015	0.962716	0.965362		0.938941	0.929342
10X_p7.5_rep2	0.962041	0.940086	0.952028	0.938941		0.929539
10X_p7.5_rep3	0.911551	0.939863	0.91437	0.929342	0.929539
1-10X p7.1_p7.6
	1X_p7.1_rep1	1X_p7.1_rep2	1X_p7.1_rep3	1X_p7.6_rep1	1X_p7.6_rep2	1X_p7.6_rep3
1X_p7.1_rep1		0.767425	0.87398	0.761027	0.801013	0.525896
1X_p7.1_rep2	0.767425		0.723472	0.588104	0.590186	0.466971
1X_p7.1_rep3	0.87398	0.723472		0.816343	0.767007	0.509785
1X_p7.6_rep1	0.761027	0.588104	0.816343		0.849385	0.576412
1X_p7.6_rep2	0.801013	0.590186	0.767007	0.849385		0.46707
1X_p7.6_rep3	0.525896	0.466971	0.509785	0.576412	0.46707
	2.5X_p7.1_rep1	2.5X_p7.1_rep2	2.5X_p7.1_rep3	2.5X_p7.6_rep1	2.5X_p7.6_rep2	2.5X_p7.6_rep3
2.5X_p7.1_rep1		0.809044	0.704862	0.729541	0.908539	0.908985
2.5X_p7.1_rep2	0.809044		0.771644	0.764832	0.84315	0.728074
2.5X_p7.1_rep3	0.704862	0.771644		0.806105	0.738414	0.77064
2.5X_p7.6_rep1	0.729541	0.764832	0.806105		0.738606	0.69191
2.5X_p7.6_rep2	0.908539	0.84315	0.738414	0.738606		0.862935
2.5X_p7.6_rep3	0.908985	0.728074	0.77064	0.69191	0.862935
	5X_p7.1_rep1	5X_p7.1_rep2	5X_p7.1_rep3	5X_p7.6_rep1	5X_p7.6_rep2	5X_p7.6_rep3
5X_p7.1_rep1		0.911744	0.821127	0.86725	0.854997	0.882435
5X_p7.1_rep2	0.911744		0.888865	0.920664	0.863062	0.927848
5X_p7.1_rep3	0.821127	0.888865		0.929781	0.862517	0.921046
5X_p7.6_rep1	0.86725	0.920664	0.929781		0.876303	0.906508
5X_p7.6_rep2	0.854997	0.863062	0.862517	0.876303		0.835545
5X_p7.6_rep3	0.882435	0.927848	0.921046	0.906508	0.835545
	10X_p7.1_rep1	10X_p7.1_rep2	10X_p7.1_rep3	10X_p7.6_rep1	10X_p7.6_rep2	10X_p7.6_rep3
10X_p7.1_rep1		0.926821	0.944003	0.914686	0.92307	0.883027
10X_p7.1_rep2	0.926821		0.961004	0.959159	0.974732	0.961878
10X_p7.1_rep3	0.944003	0.961004		0.961629	0.973271	0.934918
10X_p7.6_rep1	0.914686	0.959159	0.961629		0.970547	0.961811
10X_p7.6_rep2	0.92307	0.974732	0.973271	0.970547		0.952459
10X_p7.6_rep3	0.883027	0.961878	0.934918	0.961811	0.952459
1-10X p7.1_p7.7
	1X_p7.1_rep1	1X_p7.1_rep2	1X_p7.1_rep3	1X_p7.7_rep1	1X_p7.7_rep2	1X_p7.7_rep3
1X_p7.1_rep1		0.767425	0.87398	0.491934	0.727297	0.811013
1X_p7.1_rep2	0.767425		0.723472	0.462867	0.50637	0.681195
1X_p7.1_rep3	0.87398	0.723472		0.584784	0.491287	0.824578
1X_p7.7_rep1	0.491934	0.462867	0.584784		0.12327	0.357901
1X_p7.7_rep2	0.727297	0.50637	0.491287	0.12327		0.581841
1X_p7.7_rep3	0.811013	0.681195	0.824578	0.357901	0.581841
	2.5X_p7.1_rep1	2.5X_p7.1_rep2	2.5X_p7.1_rep3	2.5X_p7.7_rep1	2.5X_p7.7_rep2	2.5X_p7.7_rep3
2.5X_p7.1_rep1		0.809044	0.704862	0.89293	0.729921	0.872891
2.5X_p7.1_rep2	0.809044		0.771644	0.682036	0.670941	0.772563
2.5X_p7.1_rep3	0.704862	0.771644		0.600219	0.852597	0.674732
2.5X_p7.7_rep1	0.89293	0.682036	0.600219		0.616055	0.724074
2.5X_p7.7_rep2	0.729921	0.670941	0.852597	0.616055		0.687176
2.5X_p7.7_rep3	0.872891	0.772563	0.674732	0.724074	0.687176
	5X_p7.1_rep1	5X_p7.1_rep2	5X_p7.1_rep3	5X_p7.7_rep1	5X_p7.7_rep2	5X_p7.7_rep3
5X_p7.1_rep1		0.911744	0.821127	0.852933	0.913225	0.895936
5X_p7.1_rep2	0.911744		0.888865	0.916014	0.928888	0.904483
5X_p7.1_rep3	0.821127	0.888865		0.93367	0.892136	0.817517
5X_p7.7_rep1	0.852933	0.916014	0.93367		0.878361	0.881788
5X_p7.7_rep2	0.913225	0.928888	0.892136	0.878361		0.882065
5X_p7.7_rep3	0.895936	0.904483	0.817517	0.881788	0.882065
	10X_p7.1_rep1	10X_p7.1_rep2	10X_p7.1_rep3	10X_p7.7_rep1	10X_p7.7_rep2	10X_p7.7_rep3
10X_p7.1_rep1		0.926821	0.944003	0.902069	0.949645	0.883756
10X_p7.1_rep2	0.926821		0.961004	0.943764	0.962807	0.93199
10X_p7.1_rep3	0.944003	0.961004		0.948017	0.959821	0.924671
10X_p7.7_rep1	0.902069	0.943764	0.948017		0.958359	0.920858
10X_p7.7_rep2	0.949645	0.962807	0.959821	0.958359		0.929518
10X_p7.7_rep3	0.883756	0.93199	0.924671	0.920858	0.929518
1-10X p7.2_p7.3
	1X_p7.2_rep1	1X_p7.2_rep2	1X_p7.2_rep3	1X_p7.3_rep1	1X_p7.3_rep2	1X_p7.3_rep3
1X_p7.2_rep1		0.838456	0.348836	0.453505	0.799098	0.43359
1X_p7.2_rep2	0.838456		0.209996	0.231165	0.879975	0.401129
1X_p7.2_rep3	0.348836	0.209996		0.648659	0.301865	0.268313
1X_p7.3_rep1	0.453505	0.231165	0.648659		0.13404	0.337298
1X_p7.3_rep2	0.799098	0.879975	0.301865	0.13404		0.344112
1X_p7.3_rep3	0.43359	0.401129	0.268313	0.337298	0.344112
	2.5X_p7.2_rep1	2.5X_p7.2_rep2	2.5X_p7.2_rep3	2.5X_p7.3_rep1	2.5X_p7.3_rep2	2.5X_p7.3_rep3
2.5X_p7.2_rep1		0.819877	0.740144	0.760531	0.587111	0.804089
2.5X_p7.2_rep2	0.819877		0.77925	0.823273	0.488289	0.776002
2.5X_p7.2_rep3	0.740144	0.77925		0.701137	0.531886	0.672644
2.5X_p7.3_rep1	0.760531	0.823273	0.701137		0.643308	0.836289
2.5X_p7.3_rep2	0.587111	0.488289	0.531886	0.643308		0.692637
2.5X_p7.3_rep3	0.804089	0.776002	0.672644	0.836289	0.692637
	5X_p7.2_rep1	5X_p7.2_rep2	5X_p7.2_rep3	5X_p7.3_rep1	5X_p7.3_rep2	5X_p7.3_rep3
5X_p7.2_rep1		0.871653	0.852746	0.874171	0.837796	0.884197
5X_p7.2_rep2	0.871653		0.886545	0.873695	0.810086	0.898055
5X_p7.2_rep3	0.852746	0.886545		0.932261	0.878249	0.901709
5X_p7.3_rep1	0.874171	0.873695	0.932261		0.875453	0.950041
5X_p7.3_rep2	0.837796	0.810086	0.878249	0.875453		0.879006
5X_p7.3_rep3	0.884197	0.898055	0.901709	0.950041	0.879006
	10X_p7.2_rep1	10X_p7.2_rep2	10X_p7.2_rep3	10X_p7.3_rep1	10X_p7.3_rep2	10X_p7.3_rep3
10X_p7.2_rep1		0.952701	0.948603	0.953552	0.919927	0.922098
10X_p7.2_rep2	0.952701		0.968523	0.94356	0.88787	0.958805
10X_p7.2_rep3	0.948603	0.968523		0.955884	0.926466	0.960267
10X_p7.3_rep1	0.953552	0.94356	0.955884		0.927357	0.938222
10X_p7.3_rep2	0.919927	0.88787	0.926466	0.927357		0.88597
10X_p7.3_rep3	0.922098	0.958805	0.960267	0.938222	0.88597
1-10X p7.2_p7.4
	1X_p7.2_rep1	1X_p7.2_rep2	1X_p7.2_rep3	1X_p7.4_rep1	1X_p7.4_rep2	1X_p7.4_rep3
1X_p7.2_rep1		0.838456	0.348836	0.689345	0.13458	0.750525
1X_p7.2_rep2	0.838456		0.209996	0.554235	-0.137302	0.659123
1X_p7.2_rep3	0.348836	0.209996		0.152729	-0.056256	0.320662
1X_p7.4_rep1	0.689345	0.554235	0.152729		0.547944	0.78379
1X_p7.4_rep2	0.13458	-0.137302	-0.056256	0.547944		0.36306
1X_p7.4_rep3	0.750525	0.659123	0.320662	0.78379	0.36306
	2.5X_p7.2_rep1	2.5X_p7.2_rep2	2.5X_p7.2_rep3	2.5X_p7.4_rep1	2.5X_p7.4_rep2	2.5X_p7.4_rep3
2.5X_p7.2_rep1		0.819877	0.740144	0.806712	0.857213	0.769997
2.5X_p7.2_rep2	0.819877		0.77925	0.751043	0.803801	0.828757
2.5X_p7.2_rep3	0.740144	0.77925		0.594743	0.707014	0.719507
2.5X_p7.4_rep1	0.806712	0.751043	0.594743		0.733999	0.862349
2.5X_p7.4_rep2	0.857213	0.803801	0.707014	0.733999		0.833359
2.5X_p7.4_rep3	0.769997	0.828757	0.719507	0.862349	0.833359
	5X_p7.2_rep1	5X_p7.2_rep2	5X_p7.2_rep3	5X_p7.4_rep1	5X_p7.4_rep2	5X_p7.4_rep3
5X_p7.2_rep1		0.871653	0.852746	0.791001	0.807922	0.701053
5X_p7.2_rep2	0.871653		0.886545	0.905845	0.916386	0.760734
5X_p7.2_rep3	0.852746	0.886545		0.853486	0.801706	0.820615
5X_p7.4_rep1	0.791001	0.905845	0.853486		0.900723	0.86374
5X_p7.4_rep2	0.807922	0.916386	0.801706	0.900723		0.818123
5X_p7.4_rep3	0.701053	0.760734	0.820615	0.86374	0.818123
	10X_p7.2_rep1	10X_p7.2_rep2	10X_p7.2_rep3	10X_p7.4_rep1	10X_p7.4_rep2	10X_p7.4_rep3
10X_p7.2_rep1		0.952701	0.948603	0.875048	0.886886	0.946871
10X_p7.2_rep2	0.952701		0.968523	0.912564	0.919376	0.934091
10X_p7.2_rep3	0.948603	0.968523		0.900384	0.920004	0.927049
10X_p7.4_rep1	0.875048	0.912564	0.900384		0.953719	0.935651
10X_p7.4_rep2	0.886886	0.919376	0.920004	0.953719		0.919192
10X_p7.4_rep3	0.946871	0.934091	0.927049	0.935651	0.919192
1-10X p7.2_p7.5
	1X_p7.2_rep1	1X_p7.2_rep2	1X_p7.2_rep3	1X_p7.5_rep1	1X_p7.5_rep2	1X_p7.5_rep3
1X_p7.2_rep1		0.838456	0.348836	0.722696	0.762078	0.53839
1X_p7.2_rep2	0.838456		0.209996	0.851182	0.625702	0.576652
1X_p7.2_rep3	0.348836	0.209996		0.230754	0.252926	0.331635
1X_p7.5_rep1	0.722696	0.851182	0.230754		0.447531	0.452859
1X_p7.5_rep2	0.762078	0.625702	0.252926	0.447531		0.367814
1X_p7.5_rep3	0.53839	0.576652	0.331635	0.452859	0.367814
	2.5X_p7.2_rep1	2.5X_p7.2_rep2	2.5X_p7.2_rep3	2.5X_p7.5_rep1	2.5X_p7.5_rep2	2.5X_p7.5_rep3
2.5X_p7.2_rep1		0.819877	0.740144	0.774758	0.672476	0.832854
2.5X_p7.2_rep2	0.819877		0.77925	0.853768	0.660488	0.812893
2.5X_p7.2_rep3	0.740144	0.77925		0.661327	0.738268	0.670878
2.5X_p7.5_rep1	0.774758	0.853768	0.661327		0.555247	0.817069
2.5X_p7.5_rep2	0.672476	0.660488	0.738268	0.555247		0.568073
2.5X_p7.5_rep3	0.832854	0.812893	0.670878	0.817069	0.568073
	5X_p7.2_rep1	5X_p7.2_rep2	5X_p7.2_rep3	5X_p7.5_rep1	5X_p7.5_rep2	5X_p7.5_rep3
5X_p7.2_rep1		0.871653	0.852746	0.767839	0.845927	0.869919
5X_p7.2_rep2	0.871653		0.886545	0.794888	0.8804	0.913617
5X_p7.2_rep3	0.852746	0.886545		0.869429	0.856227	0.931005
5X_p7.5_rep1	0.767839	0.794888	0.869429		0.865276	0.84854
5X_p7.5_rep2	0.845927	0.8804	0.856227	0.865276		0.835623
5X_p7.5_rep3	0.869919	0.913617	0.931005	0.84854	0.835623
	10X_p7.2_rep1	10X_p7.2_rep2	10X_p7.2_rep3	10X_p7.5_rep1	10X_p7.5_rep2	10X_p7.5_rep3
10X_p7.2_rep1		0.952701	0.948603	0.913826	0.931322	0.895405
10X_p7.2_rep2	0.952701		0.968523	0.950365	0.932256	0.911828
10X_p7.2_rep3	0.948603	0.968523		0.932794	0.935979	0.905318
10X_p7.5_rep1	0.913826	0.950365	0.932794		0.938941	0.929342
10X_p7.5_rep2	0.931322	0.932256	0.935979	0.938941		0.929539
10X_p7.5_rep3	0.895405	0.911828	0.905318	0.929342	0.929539
1-10X p7.2_p7.6
	1X_p7.2_rep1	1X_p7.2_rep2	1X_p7.2_rep3	1X_p7.6_rep1	1X_p7.6_rep2	1X_p7.6_rep3
1X_p7.2_rep1		0.838456	0.348836	0.743512	0.729988	0.613536
1X_p7.2_rep2	0.838456		0.209996	0.600612	0.553326	0.410747
1X_p7.2_rep3	0.348836	0.209996		0.465047	0.660123	0.03969
1X_p7.6_rep1	0.743512	0.600612	0.465047		0.849385	0.576412
1X_p7.6_rep2	0.729988	0.553326	0.660123	0.849385		0.46707
1X_p7.6_rep3	0.613536	0.410747	0.03969	0.576412	0.46707
	2.5X_p7.2_rep1	2.5X_p7.2_rep2	2.5X_p7.2_rep3	2.5X_p7.6_rep1	2.5X_p7.6_rep2	2.5X_p7.6_rep3
2.5X_p7.2_rep1		0.819877	0.740144	0.839676	0.815625	0.754737
2.5X_p7.2_rep2	0.819877		0.77925	0.72213	0.784455	0.829481
2.5X_p7.2_rep3	0.740144	0.77925		0.699037	0.700198	0.600811
2.5X_p7.6_rep1	0.839676	0.72213	0.699037		0.738606	0.69191
2.5X_p7.6_rep2	0.815625	0.784455	0.700198	0.738606		0.862935
2.5X_p7.6_rep3	0.754737	0.829481	0.600811	0.69191	0.862935
	5X_p7.2_rep1	5X_p7.2_rep2	5X_p7.2_rep3	5X_p7.6_rep1	5X_p7.6_rep2	5X_p7.6_rep3
5X_p7.2_rep1		0.871653	0.852746	0.875163	0.766744	0.901446
5X_p7.2_rep2	0.871653		0.886545	0.874095	0.786951	0.935084
5X_p7.2_rep3	0.852746	0.886545		0.92698	0.850978	0.879283
5X_p7.6_rep1	0.875163	0.874095	0.92698		0.876303	0.906508
5X_p7.6_rep2	0.766744	0.786951	0.850978	0.876303		0.835545
5X_p7.6_rep3	0.901446	0.935084	0.879283	0.906508	0.835545
	10X_p7.2_rep1	10X_p7.2_rep2	10X_p7.2_rep3	10X_p7.6_rep1	10X_p7.6_rep2	10X_p7.6_rep3
10X_p7.2_rep1		0.952701	0.948603	0.955446	0.951894	0.962646
10X_p7.2_rep2	0.952701		0.968523	0.973686	0.961758	0.980116
10X_p7.2_rep3	0.948603	0.968523		0.954626	0.961775	0.963932
10X_p7.6_rep1	0.955446	0.973686	0.954626		0.970547	0.961811
10X_p7.6_rep2	0.951894	0.961758	0.961775	0.970547		0.952459
10X_p7.6_rep3	0.962646	0.980116	0.963932	0.961811	0.952459
1-10X p7.2_p7.7
	1X_p7.2_rep1	1X_p7.2_rep2	1X_p7.2_rep3	1X_p7.7_rep1	1X_p7.7_rep2	1X_p7.7_rep3
1X_p7.2_rep1		0.838456	0.348836	0.602928	0.510637	0.741915
1X_p7.2_rep2	0.838456		0.209996	0.457602	0.407772	0.826616
1X_p7.2_rep3	0.348836	0.209996		-0.0658368	0.70474	0.442722
1X_p7.7_rep1	0.602928	0.457602	-0.0658368		0.12327	0.357901
1X_p7.7_rep2	0.510637	0.407772	0.70474	0.12327		0.581841
1X_p7.7_rep3	0.741915	0.826616	0.442722	0.357901	0.581841
	2.5X_p7.2_rep1	2.5X_p7.2_rep2	2.5X_p7.2_rep3	2.5X_p7.7_rep1	2.5X_p7.7_rep2	2.5X_p7.7_rep3
2.5X_p7.2_rep1		0.819877	0.740144	0.693681	0.795623	0.617906
2.5X_p7.2_rep2	0.819877		0.77925	0.722532	0.859564	0.778194
2.5X_p7.2_rep3	0.740144	0.77925		0.56569	0.627378	0.736427
2.5X_p7.7_rep1	0.693681	0.722532	0.56569		0.616055	0.724074
2.5X_p7.7_rep2	0.795623	0.859564	0.627378	0.616055		0.687176
2.5X_p7.7_rep3	0.617906	0.778194	0.736427	0.724074	0.687176
	5X_p7.2_rep1	5X_p7.2_rep2	5X_p7.2_rep3	5X_p7.7_rep1	5X_p7.7_rep2	5X_p7.7_rep3
5X_p7.2_rep1		0.871653	0.852746	0.919149	0.769003	0.822483
5X_p7.2_rep2	0.871653		0.886545	0.907329	0.874257	0.873264
5X_p7.2_rep3	0.852746	0.886545		0.904759	0.896567	0.935292
5X_p7.7_rep1	0.919149	0.907329	0.904759		0.878361	0.881788
5X_p7.7_rep2	0.769003	0.874257	0.896567	0.878361		0.882065
5X_p7.7_rep3	0.822483	0.873264	0.935292	0.881788	0.882065
	10X_p7.2_rep1	10X_p7.2_rep2	10X_p7.2_rep3	10X_p7.7_rep1	10X_p7.7_rep2	10X_p7.7_rep3
10X_p7.2_rep1		0.952701	0.948603	0.924276	0.955365	0.942938
10X_p7.2_rep2	0.952701		0.968523	0.954301	0.960139	0.94158
10X_p7.2_rep3	0.948603	0.968523		0.975026	0.96482	0.913003
10X_p7.7_rep1	0.924276	0.954301	0.975026		0.958359	0.920858
10X_p7.7_rep2	0.955365	0.960139	0.96482	0.958359		0.929518
10X_p7.7_rep3	0.942938	0.94158	0.913003	0.920858	0.929518
1-10X p7.3_p7.4
	1X_p7.3_rep1	1X_p7.3_rep2	1X_p7.3_rep3	1X_p7.4_rep1	1X_p7.4_rep2	1X_p7.4_rep3
1X_p7.3_rep1		0.13404	0.337298	0.340986	0.208351	0.311481
1X_p7.3_rep2	0.13404		0.344112	0.482068	-0.182851	0.472378
1X_p7.3_rep3	0.337298	0.344112		0.701712	0.577585	0.540847
1X_p7.4_rep1	0.340986	0.482068	0.701712		0.547944	0.78379
1X_p7.4_rep2	0.208351	-0.182851	0.577585	0.547944		0.36306
1X_p7.4_rep3	0.311481	0.472378	0.540847	0.78379	0.36306
	2.5X_p7.3_rep1	2.5X_p7.3_rep2	2.5X_p7.3_rep3	2.5X_p7.4_rep1	2.5X_p7.4_rep2	2.5X_p7.4_rep3
2.5X_p7.3_rep1		0.643308	0.836289	0.853583	0.785948	0.940597
2.5X_p7.3_rep2	0.643308		0.692637	0.828214	0.494809	0.67576
2.5X_p7.3_rep3	0.836289	0.692637		0.881211	0.734707	0.854116
2.5X_p7.4_rep1	0.853583	0.828214	0.881211		0.733999	0.862349
2.5X_p7.4_rep2	0.785948	0.494809	0.734707	0.733999		0.833359
2.5X_p7.4_rep3	0.940597	0.67576	0.854116	0.862349	0.833359
	5X_p7.3_rep1	5X_p7.3_rep2	5X_p7.3_rep3	5X_p7.4_rep1	5X_p7.4_rep2	5X_p7.4_rep3
5X_p7.3_rep1		0.875453	0.950041	0.859491	0.816332	0.767749
5X_p7.3_rep2	0.875453		0.879006	0.851004	0.806403	0.834761
5X_p7.3_rep3	0.950041	0.879006		0.902543	0.835064	0.755517
5X_p7.4_rep1	0.859491	0.851004	0.902543		0.900723	0.86374
5X_p7.4_rep2	0.816332	0.806403	0.835064	0.900723		0.818123
5X_p7.4_rep3	0.767749	0.834761	0.755517	0.86374	0.818123
	10X_p7.3_rep1	10X_p7.3_rep2	10X_p7.3_rep3	10X_p7.4_rep1	10X_p7.4_rep2	10X_p7.4_rep3
10X_p7.3_rep1		0.927357	0.938222	0.867317	0.869763	0.926401
10X_p7.3_rep2	0.927357		0.88597	0.881984	0.908863	0.918296
10X_p7.3_rep3	0.938222	0.88597		0.881375	0.899626	0.898095
10X_p7.4_rep1	0.867317	0.881984	0.881375		0.953719	0.935651
10X_p7.4_rep2	0.869763	0.908863	0.899626	0.953719		0.919192
10X_p7.4_rep3	0.926401	0.918296	0.898095	0.935651	0.919192
1-10X p7.3_p7.5
	1X_p7.3_rep1	1X_p7.3_rep2	1X_p7.3_rep3	1X_p7.5_rep1	1X_p7.5_rep2	1X_p7.5_rep3
1X_p7.3_rep1		0.13404	0.337298	0.298702	0.380621	0.580134
1X_p7.3_rep2	0.13404		0.344112	0.821073	0.567535	0.498192
1X_p7.3_rep3	0.337298	0.344112		0.218129	0.523097	0.543595
1X_p7.5_rep1	0.298702	0.821073	0.218129		0.447531	0.452859
1X_p7.5_rep2	0.380621	0.567535	0.523097	0.447531		0.367814
1X_p7.5_rep3	0.580134	0.498192	0.543595	0.452859	0.367814
	2.5X_p7.3_rep1	2.5X_p7.3_rep2	2.5X_p7.3_rep3	2.5X_p7.5_rep1	2.5X_p7.5_rep2	2.5X_p7.5_rep3
2.5X_p7.3_rep1		0.643308	0.836289	0.878581	0.617692	0.796756
2.5X_p7.3_rep2	0.643308		0.692637	0.606927	0.585544	0.684335
2.5X_p7.3_rep3	0.836289	0.692637		0.842187	0.627386	0.872951
2.5X_p7.5_rep1	0.878581	0.606927	0.842187		0.555247	0.817069
2.5X_p7.5_rep2	0.617692	0.585544	0.627386	0.555247		0.568073
2.5X_p7.5_rep3	0.796756	0.684335	0.872951	0.817069	0.568073
	5X_p7.3_rep1	5X_p7.3_rep2	5X_p7.3_rep3	5X_p7.5_rep1	5X_p7.5_rep2	5X_p7.5_rep3
5X_p7.3_rep1		0.875453	0.950041	0.903564	0.917059	0.917193
5X_p7.3_rep2	0.875453		0.879006	0.882302	0.83662	0.8411
5X_p7.3_rep3	0.950041	0.879006		0.867959	0.927971	0.897885
5X_p7.5_rep1	0.903564	0.882302	0.867959		0.865276	0.84854
5X_p7.5_rep2	0.917059	0.83662	0.927971	0.865276		0.835623
5X_p7.5_rep3	0.917193	0.8411	0.897885	0.84854	0.835623
	10X_p7.3_rep1	10X_p7.3_rep2	10X_p7.3_rep3	10X_p7.5_rep1	10X_p7.5_rep2	10X_p7.5_rep3
10X_p7.3_rep1		0.927357	0.938222	0.887722	0.922736	0.870569
10X_p7.3_rep2	0.927357		0.88597	0.882373	0.944113	0.890946
10X_p7.3_rep3	0.938222	0.88597		0.909037	0.911414	0.867719
10X_p7.5_rep1	0.887722	0.882373	0.909037		0.938941	0.929342
10X_p7.5_rep2	0.922736	0.944113	0.911414	0.938941		0.929539
10X_p7.5_rep3	0.870569	0.890946	0.867719	0.929342	0.929539
1-10X p7.3_p7.6
	1X_p7.3_rep1	1X_p7.3_rep2	1X_p7.3_rep3	1X_p7.6_rep1	1X_p7.6_rep2	1X_p7.6_rep3
1X_p7.3_rep1		0.13404	0.337298	0.664704	0.772071	0.265294
1X_p7.3_rep2	0.13404		0.344112	0.399977	0.455778	0.331245
1X_p7.3_rep3	0.337298	0.344112		0.479458	0.410713	0.760808
1X_p7.6_rep1	0.664704	0.399977	0.479458		0.849385	0.576412
1X_p7.6_rep2	0.772071	0.455778	0.410713	0.849385		0.46707
1X_p7.6_rep3	0.265294	0.331245	0.760808	0.576412	0.46707
	2.5X_p7.3_rep1	2.5X_p7.3_rep2	2.5X_p7.3_rep3	2.5X_p7.6_rep1	2.5X_p7.6_rep2	2.5X_p7.6_rep3
2.5X_p7.3_rep1		0.643308	0.836289	0.688815	0.871627	0.848909
2.5X_p7.3_rep2	0.643308		0.692637	0.71563	0.786018	0.644982
2.5X_p7.3_rep3	0.836289	0.692637		0.845053	0.84229	0.866081
2.5X_p7.6_rep1	0.688815	0.71563	0.845053		0.738606	0.69191
2.5X_p7.6_rep2	0.871627	0.786018	0.84229	0.738606		0.862935
2.5X_p7.6_rep3	0.848909	0.644982	0.866081	0.69191	0.862935
	5X_p7.3_rep1	5X_p7.3_rep2	5X_p7.3_rep3	5X_p7.6_rep1	5X_p7.6_rep2	5X_p7.6_rep3
5X_p7.3_rep1		0.875453	0.950041	0.958629	0.822335	0.9174
5X_p7.3_rep2	0.875453		0.879006	0.905829	0.856672	0.842506
5X_p7.3_rep3	0.950041	0.879006		0.950443	0.825332	0.943684
5X_p7.6_rep1	0.958629	0.905829	0.950443		0.876303	0.906508
5X_p7.6_rep2	0.822335	0.856672	0.825332	0.876303		0.835545
5X_p7.6_rep3	0.9174	0.842506	0.943684	0.906508	0.835545
	10X_p7.3_rep1	10X_p7.3_rep2	10X_p7.3_rep3	10X_p7.6_rep1	10X_p7.6_rep2	10X_p7.6_rep3
10X_p7.3_rep1		0.927357	0.938222	0.930651	0.923469	0.964733
10X_p7.3_rep2	0.927357		0.88597	0.905441	0.921613	0.895907
10X_p7.3_rep3	0.938222	0.88597		0.951903	0.944222	0.959528
10X_p7.6_rep1	0.930651	0.905441	0.951903		0.970547	0.961811
10X_p7.6_rep2	0.923469	0.921613	0.944222	0.970547		0.952459
10X_p7.6_rep3	0.964733	0.895907	0.959528	0.961811	0.952459
1-10X p7.3_p7.7
	1X_p7.3_rep1	1X_p7.3_rep2	1X_p7.3_rep3	1X_p7.7_rep1	1X_p7.7_rep2	1X_p7.7_rep3
1X_p7.3_rep1		0.13404	0.337298	0.370668	0.654142	0.500519
1X_p7.3_rep2	0.13404		0.344112	0.291851	0.604963	0.76082
1X_p7.3_rep3	0.337298	0.344112		0.729834	0.16653	0.221178
1X_p7.7_rep1	0.370668	0.291851	0.729834		0.12327	0.357901
1X_p7.7_rep2	0.654142	0.604963	0.16653	0.12327		0.581841
1X_p7.7_rep3	0.500519	0.76082	0.221178	0.357901	0.581841
	2.5X_p7.3_rep1	2.5X_p7.3_rep2	2.5X_p7.3_rep3	2.5X_p7.7_rep1	2.5X_p7.7_rep2	2.5X_p7.7_rep3
2.5X_p7.3_rep1		0.643308	0.836289	0.774932	0.839129	0.874744
2.5X_p7.3_rep2	0.643308		0.692637	0.653609	0.455394	0.689678
2.5X_p7.3_rep3	0.836289	0.692637		0.695885	0.892913	0.739861
2.5X_p7.7_rep1	0.774932	0.653609	0.695885		0.616055	0.724074
2.5X_p7.7_rep2	0.839129	0.455394	0.892913	0.616055		0.687176
2.5X_p7.7_rep3	0.874744	0.689678	0.739861	0.724074	0.687176
	5X_p7.3_rep1	5X_p7.3_rep2	5X_p7.3_rep3	5X_p7.7_rep1	5X_p7.7_rep2	5X_p7.7_rep3
5X_p7.3_rep1		0.875453	0.950041	0.908543	0.910746	0.883572
5X_p7.3_rep2	0.875453		0.879006	0.876349	0.893385	0.832378
5X_p7.3_rep3	0.950041	0.879006		0.932997	0.920614	0.857853
5X_p7.7_rep1	0.908543	0.876349	0.932997		0.878361	0.881788
5X_p7.7_rep2	0.910746	0.893385	0.920614	0.878361		0.882065
5X_p7.7_rep3	0.883572	0.832378	0.857853	0.881788	0.882065
	10X_p7.3_rep1	10X_p7.3_rep2	10X_p7.3_rep3	10X_p7.7_rep1	10X_p7.7_rep2	10X_p7.7_rep3
10X_p7.3_rep1		0.927357	0.938222	0.932143	0.936404	0.87453
10X_p7.3_rep2	0.927357		0.88597	0.911774	0.940374	0.855017
10X_p7.3_rep3	0.938222	0.88597		0.959445	0.944354	0.891909
10X_p7.7_rep1	0.932143	0.911774	0.959445		0.958359	0.920858
10X_p7.7_rep2	0.936404	0.940374	0.944354	0.958359		0.929518
10X_p7.7_rep3	0.87453	0.855017	0.891909	0.920858	0.929518
1-10X p7.4_p7.5
	1X_p7.4_rep1	1X_p7.4_rep2	1X_p7.4_rep3	1X_p7.5_rep1	1X_p7.5_rep2	1X_p7.5_rep3
1X_p7.4_rep1		0.547944	0.78379	0.426012	0.715733	0.350166
1X_p7.4_rep2	0.547944		0.36306	0.0340233	0.308118	0.0455795
1X_p7.4_rep3	0.78379	0.36306		0.495184	0.777869	0.391595
1X_p7.5_rep1	0.426012	0.0340233	0.495184		0.447531	0.452859
1X_p7.5_rep2	0.715733	0.308118	0.777869	0.447531		0.367814
1X_p7.5_rep3	0.350166	0.0455795	0.391595	0.452859	0.367814
	2.5X_p7.4_rep1	2.5X_p7.4_rep2	2.5X_p7.4_rep3	2.5X_p7.5_rep1	2.5X_p7.5_rep2	2.5X_p7.5_rep3
2.5X_p7.4_rep1		0.733999	0.862349	0.851796	0.561137	0.850066
2.5X_p7.4_rep2	0.733999		0.833359	0.800516	0.631955	0.72528
2.5X_p7.4_rep3	0.862349	0.833359		0.890084	0.600957	0.816225
2.5X_p7.5_rep1	0.851796	0.800516	0.890084		0.555247	0.817069
2.5X_p7.5_rep2	0.561137	0.631955	0.600957	0.555247		0.568073
2.5X_p7.5_rep3	0.850066	0.72528	0.816225	0.817069	0.568073
	5X_p7.4_rep1	5X_p7.4_rep2	5X_p7.4_rep3	5X_p7.5_rep1	5X_p7.5_rep2	5X_p7.5_rep3
5X_p7.4_rep1		0.900723	0.86374	0.879892	0.87045	0.863268
5X_p7.4_rep2	0.900723		0.818123	0.826724	0.816076	0.866595
5X_p7.4_rep3	0.86374	0.818123		0.890729	0.747228	0.777323
5X_p7.5_rep1	0.879892	0.826724	0.890729		0.865276	0.84854
5X_p7.5_rep2	0.87045	0.816076	0.747228	0.865276		0.835623
5X_p7.5_rep3	0.863268	0.866595	0.777323	0.84854	0.835623
	10X_p7.4_rep1	10X_p7.4_rep2	10X_p7.4_rep3	10X_p7.5_rep1	10X_p7.5_rep2	10X_p7.5_rep3
10X_p7.4_rep1		0.953719	0.935651	0.923803	0.908348	0.896497
10X_p7.4_rep2	0.953719		0.919192	0.916221	0.905806	0.900223
10X_p7.4_rep3	0.935651	0.919192		0.911892	0.909713	0.895391
10X_p7.5_rep1	0.923803	0.916221	0.911892		0.938941	0.929342
10X_p7.5_rep2	0.908348	0.905806	0.909713	0.938941		0.929539
10X_p7.5_rep3	0.896497	0.900223	0.895391	0.929342	0.929539
1-10X p7.4_p7.6
	1X_p7.4_rep1	1X_p7.4_rep2	1X_p7.4_rep3	1X_p7.6_rep1	1X_p7.6_rep2	1X_p7.6_rep3
1X_p7.4_rep1		0.547944	0.78379	0.604955	0.478684	0.845638
1X_p7.4_rep2	0.547944		0.36306	0.254464	0.131354	0.674786
1X_p7.4_rep3	0.78379	0.36306		0.749519	0.608214	0.791492
1X_p7.6_rep1	0.604955	0.254464	0.749519		0.849385	0.576412
1X_p7.6_rep2	0.478684	0.131354	0.608214	0.849385		0.46707
1X_p7.6_rep3	0.845638	0.674786	0.791492	0.576412	0.46707
	2.5X_p7.4_rep1	2.5X_p7.4_rep2	2.5X_p7.4_rep3	2.5X_p7.6_rep1	2.5X_p7.6_rep2	2.5X_p7.6_rep3
2.5X_p7.4_rep1		0.733999	0.862349	0.793262	0.897776	0.87768
2.5X_p7.4_rep2	0.733999		0.833359	0.659869	0.808406	0.732523
2.5X_p7.4_rep3	0.862349	0.833359		0.732054	0.875863	0.856639
2.5X_p7.6_rep1	0.793262	0.659869	0.732054		0.738606	0.69191
2.5X_p7.6_rep2	0.897776	0.808406	0.875863	0.738606		0.862935
2.5X_p7.6_rep3	0.87768	0.732523	0.856639	0.69191	0.862935
	5X_p7.4_rep1	5X_p7.4_rep2	5X_p7.4_rep3	5X_p7.6_rep1	5X_p7.6_rep2	5X_p7.6_rep3
5X_p7.4_rep1		0.900723	0.86374	0.88356	0.856152	0.896657
5X_p7.4_rep2	0.900723		0.818123	0.826825	0.82094	0.907649
5X_p7.4_rep3	0.86374	0.818123		0.835014	0.893469	0.779618
5X_p7.6_rep1	0.88356	0.826825	0.835014		0.876303	0.906508
5X_p7.6_rep2	0.856152	0.82094	0.893469	0.876303		0.835545
5X_p7.6_rep3	0.896657	0.907649	0.779618	0.906508	0.835545
	10X_p7.4_rep1	10X_p7.4_rep2	10X_p7.4_rep3	10X_p7.6_rep1	10X_p7.6_rep2	10X_p7.6_rep3
10X_p7.4_rep1		0.953719	0.935651	0.932191	0.905433	0.883312
10X_p7.4_rep2	0.953719		0.919192	0.944301	0.929342	0.886633
10X_p7.4_rep3	0.935651	0.919192		0.940117	0.931794	0.929525
10X_p7.6_rep1	0.932191	0.944301	0.940117		0.970547	0.961811
10X_p7.6_rep2	0.905433	0.929342	0.931794	0.970547		0.952459
10X_p7.6_rep3	0.883312	0.886633	0.929525	0.961811	0.952459
1-10X p7.4_p7.6
	1X_p7.4_rep1	1X_p7.4_rep2	1X_p7.4_rep3	1X_p7.7_rep1	1X_p7.7_rep2	1X_p7.7_rep3
1X_p7.4_rep1		0.547944	0.78379	0.758281	0.467509	0.398293
1X_p7.4_rep2	0.547944		0.36306	0.507491	0.187161	-0.223073
1X_p7.4_rep3	0.78379	0.36306		0.765003	0.469731	0.493341
1X_p7.7_rep1	0.758281	0.507491	0.765003		0.12327	0.357901
1X_p7.7_rep2	0.467509	0.187161	0.469731	0.12327		0.581841
1X_p7.7_rep3	0.398293	-0.223073	0.493341	0.357901	0.581841
	2.5X_p7.4_rep1	2.5X_p7.4_rep2	2.5X_p7.4_rep3	2.5X_p7.7_rep1	2.5X_p7.7_rep2	2.5X_p7.7_rep3
2.5X_p7.4_rep1		0.733999	0.862349	0.76258	0.784682	0.779906
2.5X_p7.4_rep2	0.733999		0.833359	0.799988	0.712013	0.665379
2.5X_p7.4_rep3	0.862349	0.833359		0.855048	0.801764	0.889176
2.5X_p7.7_rep1	0.76258	0.799988	0.855048		0.616055	0.724074
2.5X_p7.7_rep2	0.784682	0.712013	0.801764	0.616055		0.687176
2.5X_p7.7_rep3	0.779906	0.665379	0.889176	0.724074	0.687176
	5X_p7.4_rep1	5X_p7.4_rep2	5X_p7.4_rep3	5X_p7.7_rep1	5X_p7.7_rep2	5X_p7.7_rep3
5X_p7.4_rep1		0.900723	0.86374	0.901426	0.913548	0.812337
5X_p7.4_rep2	0.900723		0.818123	0.886028	0.868081	0.793929
5X_p7.4_rep3	0.86374	0.818123		0.861565	0.819179	0.800086
5X_p7.7_rep1	0.901426	0.886028	0.861565		0.878361	0.881788
5X_p7.7_rep2	0.913548	0.868081	0.819179	0.878361		0.882065
5X_p7.7_rep3	0.812337	0.793929	0.800086	0.881788	0.882065
	10X_p7.4_rep1	10X_p7.4_rep2	10X_p7.4_rep3	10X_p7.7_rep1	10X_p7.7_rep2	10X_p7.7_rep3
10X_p7.4_rep1		0.953719	0.935651	0.919497	0.909572	0.880804
10X_p7.4_rep2	0.953719		0.919192	0.936328	0.937276	0.888537
10X_p7.4_rep3	0.935651	0.919192		0.909515	0.935392	0.895563
10X_p7.7_rep1	0.919497	0.936328	0.909515		0.958359	0.920858
10X_p7.7_rep2	0.909572	0.937276	0.935392	0.958359		0.929518
10X_p7.7_rep3	0.880804	0.888537	0.895563	0.920858	0.929518
1-10X p7.5_p7.6
	1X_p7.5_rep1	1X_p7.5_rep2	1X_p7.5_rep3	1X_p7.6_rep1	1X_p7.6_rep2	1X_p7.6_rep3
1X_p7.5_rep1		0.447531	0.452859	0.418181	0.387462	0.235125
1X_p7.5_rep2	0.447531		0.367814	0.753486	0.636227	0.764314
1X_p7.5_rep3	0.452859	0.367814		0.69384	0.583844	0.271637
1X_p7.6_rep1	0.418181	0.753486	0.69384		0.849385	0.576412
1X_p7.6_rep2	0.387462	0.636227	0.583844	0.849385		0.46707
1X_p7.6_rep3	0.235125	0.764314	0.271637	0.576412	0.46707
	2.5X_p7.5_rep1	2.5X_p7.5_rep2	2.5X_p7.5_rep3	2.5X_p7.6_rep1	2.5X_p7.6_rep2	2.5X_p7.6_rep3
2.5X_p7.5_rep1		0.555247	0.817069	0.729814	0.869558	0.940116
2.5X_p7.5_rep2	0.555247		0.568073	0.682875	0.618739	0.516832
2.5X_p7.5_rep3	0.817069	0.568073		0.826305	0.825546	0.872417
2.5X_p7.6_rep1	0.729814	0.682875	0.826305		0.738606	0.69191
2.5X_p7.6_rep2	0.869558	0.618739	0.825546	0.738606		0.862935
2.5X_p7.6_rep3	0.940116	0.516832	0.872417	0.69191	0.862935
	5X_p7.5_rep1	5X_p7.5_rep2	5X_p7.5_rep3	5X_p7.6_rep1	5X_p7.6_rep2	5X_p7.6_rep3
5X_p7.5_rep1		0.865276	0.84854	0.916789	0.917537	0.85665
5X_p7.5_rep2	0.865276		0.835623	0.907066	0.808997	0.90832
5X_p7.5_rep3	0.84854	0.835623		0.88731	0.818844	0.920669
5X_p7.6_rep1	0.916789	0.907066	0.88731		0.876303	0.906508
5X_p7.6_rep2	0.917537	0.808997	0.818844	0.876303		0.835545
5X_p7.6_rep3	0.85665	0.90832	0.920669	0.906508	0.835545
	10X_p7.5_rep1	10X_p7.5_rep2	10X_p7.5_rep3	10X_p7.6_rep1	10X_p7.6_rep2	10X_p7.6_rep3
10X_p7.5_rep1		0.938941	0.929342	0.943503	0.95344	0.925204
10X_p7.5_rep2	0.938941		0.929539	0.93197	0.939292	0.928717
10X_p7.5_rep3	0.929342	0.929539		0.898048	0.93317	0.901676
10X_p7.6_rep1	0.943503	0.93197	0.898048		0.970547	0.961811
10X_p7.6_rep2	0.95344	0.939292	0.93317	0.970547		0.952459
10X_p7.6_rep3	0.925204	0.928717	0.901676	0.961811	0.952459
1-10X p7.5_p7.7
	1X_p7.5_rep1	1X_p7.5_rep2	1X_p7.5_rep3	1X_p7.7_rep1	1X_p7.7_rep2	1X_p7.7_rep3
1X_p7.5_rep1		0.447531	0.452859	0.253117	0.458918	0.655629
1X_p7.5_rep2	0.447531		0.367814	0.718793	0.445769	0.465122
1X_p7.5_rep3	0.452859	0.367814		0.438771	0.326836	0.611222
1X_p7.7_rep1	0.253117	0.718793	0.438771		0.12327	0.357901
1X_p7.7_rep2	0.458918	0.445769	0.326836	0.12327		0.581841
1X_p7.7_rep3	0.655629	0.465122	0.611222	0.357901	0.581841
	2.5X_p7.5_rep1	2.5X_p7.5_rep2	2.5X_p7.5_rep3	2.5X_p7.7_rep1	2.5X_p7.7_rep2	2.5X_p7.7_rep3
2.5X_p7.5_rep1		0.555247	0.817069	0.821751	0.85474	0.784367
2.5X_p7.5_rep2	0.555247		0.568073	0.580887	0.581411	0.582876
2.5X_p7.5_rep3	0.817069	0.568073		0.662107	0.866902	0.762615
2.5X_p7.7_rep1	0.821751	0.580887	0.662107		0.616055	0.724074
2.5X_p7.7_rep2	0.85474	0.581411	0.866902	0.616055		0.687176
2.5X_p7.7_rep3	0.784367	0.582876	0.762615	0.724074	0.687176
	5X_p7.5_rep1	5X_p7.5_rep2	5X_p7.5_rep3	5X_p7.7_rep1	5X_p7.7_rep2	5X_p7.7_rep3
5X_p7.5_rep1		0.865276	0.84854	0.866156	0.908385	0.809846
5X_p7.5_rep2	0.865276		0.835623	0.886214	0.867341	0.820028
5X_p7.5_rep3	0.84854	0.835623		0.900355	0.891485	0.907362
5X_p7.7_rep1	0.866156	0.886214	0.900355		0.878361	0.881788
5X_p7.7_rep2	0.908385	0.867341	0.891485	0.878361		0.882065
5X_p7.7_rep3	0.809846	0.820028	0.907362	0.881788	0.882065
	10X_p7.5_rep1	10X_p7.5_rep2	10X_p7.5_rep3	10X_p7.7_rep1	10X_p7.7_rep2	10X_p7.7_rep3
10X_p7.5_rep1		0.938941	0.929342	0.92709	0.944209	0.928479
10X_p7.5_rep2	0.938941		0.929539	0.921112	0.958369	0.892302
10X_p7.5_rep3	0.929342	0.929539		0.897272	0.933113	0.890642
10X_p7.7_rep1	0.92709	0.921112	0.897272		0.958359	0.920858
10X_p7.7_rep2	0.944209	0.958369	0.933113	0.958359		0.929518
10X_p7.7_rep3	0.928479	0.892302	0.890642	0.920858	0.929518
1-10X p7.6_p7.7
	1X_p7.6_rep1	1X_p7.6_rep2	1Xp7.6_rep3	1X_p7.7_rep1	1X_p7.7_rep2	1X_p7.7_rep3
1X_p7.6_rep1		0.849385	0.576412	0.535735	0.574534	0.610944
1X_p7.6_rep2	0.849385		0.46707	0.510652	0.657015	0.714099
1Xp7.6_rep3	0.576412	0.46707		0.877835	0.254649	0.252767
1X_p7.7_rep1	0.535735	0.510652	0.877835		0.12327	0.357901
1X_p7.7_rep2	0.574534	0.657015	0.254649	0.12327		0.581841
1X_p7.7_rep3	0.610944	0.714099	0.252767	0.357901	0.581841
	2.5X_p7.6_rep1	2.5X_p7.6_rep2	2.5X_p7.6_rep3	2.5X_p7.7_rep1	2.5X_p7.7_rep2	2.5X_p7.7_rep3
2.5X_p7.6_rep1		0.738606	0.69191	0.6197	0.731245	0.637386
2.5X_p7.6_rep2	0.738606		0.862935	0.819049	0.76703	0.830668
2.5X_p7.6_rep3	0.69191	0.862935		0.800969	0.873217	0.818283
2.5X_p7.7_rep1	0.6197	0.819049	0.800969		0.616055	0.724074
2.5X_p7.7_rep2	0.731245	0.76703	0.873217	0.616055		0.687176
2.5X_p7.7_rep3	0.637386	0.830668	0.818283	0.724074	0.687176
	5X_p7.6_rep1	5X_p7.6_rep2	5X_p7.6_rep3	5X_p7.7_rep1	5X_p7.7_rep2	5X_p7.7_rep3
5X_p7.6_rep1		0.876303	0.906508	0.931749	0.908338	0.877086
5X_p7.6_rep2	0.876303		0.835545	0.847428	0.87297	0.824358
5X_p7.6_rep3	0.906508	0.835545		0.952592	0.885037	0.854228
5X_p7.7_rep1	0.931749	0.847428	0.952592		0.878361	0.881788
5X_p7.7_rep2	0.908338	0.87297	0.885037	0.878361		0.882065
5X_p7.7_rep3	0.877086	0.824358	0.854228	0.881788	0.882065
	10X_p7.6_rep1	10X_p7.6_rep2	10X_p7.6_rep3	10X_p7.7_rep1	10X_p7.7_rep2	10X_p7.7_rep3
10X_p7.6_rep1		0.970547	0.961811	0.956971	0.962012	0.941413
10X_p7.6_rep2	0.970547		0.952459	0.952429	0.973073	0.931747
10X_p7.6_rep3	0.961811	0.952459		0.938046	0.958304	0.927329
10X_p7.7_rep1	0.956971	0.952429	0.938046		0.958359	0.920858
10X_p7.7_rep2	0.962012	0.973073	0.958304	0.958359		0.929518
10X_p7.7_rep3	0.941413	0.931747	0.927329	0.920858	0.929518

## Sheet: p7.6 and p7.6_601_insert 1-15X
p7.6
	1x rep1 p7.6	1x rep2 p7.6	1x rep3 p7.6	1x rep4 p7.6	1x rep5 p7.6	1x rep6 p7.6
1x rep1 p7.6		0.849385	0.576412	0.273632	0.341122	0.54623
1x rep2 p7.6	0.849385		0.46707	0.217797	0.354874	0.443126
1x rep3 p7.6	0.576412	0.46707		0.330748	0.337127	0.766406
1x rep4 p7.6	0.273632	0.217797	0.330748		0.67455	0.444229
1x rep5 p7.6	0.341122	0.354874	0.337127	0.67455		0.703833
1x rep6 p7.6	0.54623	0.443126	0.766406	0.444229	0.703833
	2.5x rep 1 p7.6	2.5x rep 2 p7.6	2.5x rep3 p7.6	2.5x rep4 p7.6	2.5x rep5 p7.6	2.5x rep6 p7.6
2.5x rep 1 p7.6		0.738606	0.69191	0.704938	0.631181	0.814607
2.5x rep 2 p7.6	0.738606		0.862935	0.798179	0.845388	0.847015
2.5x rep3 p7.6	0.69191	0.862935		0.848398	0.748247	0.900166
2.5x rep4 p7.6	0.704938	0.798179	0.848398		0.647546	0.846394
2.5x rep5 p7.6	0.631181	0.845388	0.748247	0.647546		0.738005
2.5x rep6 p7.6	0.814607	0.847015	0.900166	0.846394	0.738005
	5x rep1 p7.6	5x rep2 p7.6	5x rep3 p7.6	5x rep4 p7.6	5x rep5 p7.6	5x rep6 p7.6
5x rep1 p7.6		0.876303	0.906508	0.948509	0.932139	0.911676
5x rep2 p7.6	0.876303		0.835545	0.819306	0.893245	0.806036
5x rep3 p7.6	0.906508	0.835545		0.923895	0.933955	0.928921
5x rep4 p7.6	0.948509	0.819306	0.923895		0.889312	0.897622
5x rep5 p7.6	0.932139	0.893245	0.933955	0.889312		0.916031
5x rep6 p7.6	0.911676	0.806036	0.928921	0.897622	0.916031
	10x rep1 p7.6	10x rep2 p7.6	10x rep3 p7.6	10x rep4 p7.6	10x rep5 p7.6	10x rep6 p7.6
10x rep1 p7.6		0.970547	0.961811	0.96806	0.950161	0.973739
10x rep2 p7.6	0.970547		0.952459	0.971887	0.959781	0.963213
10x rep3 p7.6	0.961811	0.952459		0.962929	0.955114	0.960255
10x rep4 p7.6	0.96806	0.971887	0.962929		0.949456	0.958463
10x rep5 p7.6	0.950161	0.959781	0.955114	0.949456		0.967114
10x rep6 p7.6	0.973739	0.963213	0.960255	0.958463	0.967114
	15x rep1 p7.6	15x rep2 p7.6	15x rep3 p7.6	15x rep4 p7.6	15x rep5 p7.6	15x rep6 p7.6
15x rep1 p7.6		0.930732	0.943978	0.970809	0.95909	0.96253
15x rep2 p7.6	0.930732		0.95147	0.945627	0.955506	0.969043
15x rep3 p7.6	0.943978	0.95147		0.972514	0.972121	0.980906
15x rep4 p7.6	0.970809	0.945627	0.972514		0.966512	0.982252
15x rep5 p7.6	0.95909	0.955506	0.972121	0.966512		0.971004
15x rep6 p7.6	0.96253	0.969043	0.980906	0.982252	0.971004
p7.6_601
	1x rep1 p7.6_601	1x rep2 p7.6_601	1x rep3 p7.6_601	1x rep4 p7.6_601	1x rep5 p7.6_601	1x rep6 p7.6_601
1x rep1 p7.6_601		0.959187	0.818642	0.688018	0.749744	0.773214
1x rep2 p7.6_601	0.959187		0.837255	0.668467	0.748016	0.765174
1x rep3 p7.6_601	0.818642	0.837255		0.908972	0.849103	0.935123
1x rep4 p7.6_601	0.688018	0.668467	0.908972		0.786775	0.955425
1x rep5 p7.6_601	0.749744	0.748016	0.849103	0.786775		0.846628
1x rep6 p7.6_601	0.773214	0.765174	0.935123	0.955425	0.846628
	2.5x rep 1 p7.6_601	2.5x rep 2 p7.6_601	2.5x rep3 p7.6_601	2.5x rep4 p7.6_601	2.5x rep5 p7.6_601	2.5x rep6 p7.6_601
2.5x rep 1 p7.6_601		0.976502	0.890242	0.943198	0.967721	0.932915
2.5x rep 2 p7.6_601	0.976502		0.857252	0.954783	0.938027	0.91266
2.5x rep3 p7.6_601	0.890242	0.857252		0.891688	0.954832	0.912857
2.5x rep4 p7.6_601	0.943198	0.954783	0.891688		0.927936	0.965134
2.5x rep5 p7.6_601	0.967721	0.938027	0.954832	0.927936		0.931467
2.5x rep6 p7.6_601	0.932915	0.91266	0.912857	0.965134	0.931467
	5x rep1 p7.6_601	5x rep2 p7.6_601	5x rep3 p7.6_601	5x rep4 p7.6_601	5x rep5 p7.6_601	5x rep6 p7.6_601
5x rep1 p7.6_601		0.979633	0.991405	0.976225	0.975518	0.984896
5x rep2 p7.6_601	0.979633		0.982601	0.977774	0.98513	0.983875
5x rep3 p7.6_601	0.991405	0.982601		0.976979	0.973876	0.982537
5x rep4 p7.6_601	0.976225	0.977774	0.976979		0.971339	0.991697
5x rep5 p7.6_601	0.975518	0.98513	0.973876	0.971339		0.976347
5x rep6 p7.6_601	0.984896	0.983875	0.982537	0.991697	0.976347
	10x rep1 p7.6_601	10x rep2 p7.6_601	10x rep3 p7.6_601	10x rep4 p7.6_601	10x rep5 p7.6_601	10x rep6 p7.6_601
10x rep1 p7.6_601		0.971378	0.978146	0.986211	0.984464	0.976521
10x rep2 p7.6_601	0.971378		0.985695	0.990131	0.971169	0.986323
10x rep3 p7.6_601	0.978146	0.985695		0.993014	0.979563	0.989934
10x rep4 p7.6_601	0.986211	0.990131	0.993014		0.987162	0.988935
10x rep5 p7.6_601	0.984464	0.971169	0.979563	0.987162		0.972312
10x rep6 p7.6_601	0.976521	0.986323	0.989934	0.988935	0.972312
	15x rep1 p7.6_601	15x rep2 p7.6_601	15x rep3 p7.6_601	15x rep4 p7.6_601	15x rep5 p7.6_601	15x rep6 p7.6_601
15x rep1 p7.6_601		0.990102	0.995716	0.988956	0.993168	0.99318
15x rep2 p7.6_601	0.990102		0.988284	0.983807	0.991277	0.983036
15x rep3 p7.6_601	0.995716	0.988284		0.989897	0.990719	0.991651
15x rep4 p7.6_601	0.988956	0.983807	0.989897		0.989836	0.977946
15x rep5 p7.6_601	0.993168	0.991277	0.990719	0.989836		0.983273
15x rep6 p7.6_601	0.99318	0.983036	0.991651	0.977946	0.983273
